# Supplementary material for: Impact of the aliphatic side chain length on photovoltaic properties of fullerenes functionalized with 3-(1-indenyl)propionic acid esters
Source: Royal Society of Chemistry journal article supplement (doi:10.1039/d3nj05428d), 2024-01-01
Supplement: d3nj05428d1.pdf [file d3nj05428d1.pdf]

## Supplementary Information

### Impact of aliphatic side chain length on photovoltaic properties of fullerenes functionalized with 3-(1-indenyl)propionic acid esters.

Piotr Piotrowski<sup>1</sup>, Wojciech Mech<sup>2</sup>, Andrzej Kaim<sup>1</sup>, Rafał Bożek<sup>2</sup>, Maria Kamińska<sup>2</sup>,  
Krzysztof P. Korona<sup>2</sup>

<sup>1</sup> Faculty of Chemistry, University of Warsaw, Pasteura 1, 02-093 Warsaw, Poland;

<sup>2</sup> Faculty of Physics, University of Warsaw, Pasteura 5, 02-093 Warsaw, Poland;

#### Correspondence

Wojciech Mech, Faculty of Physics, University of Warsaw, Pasteura 1, 02-093 Warsaw, Poland.

E-mail: wojciech.mech@fuw.edu.pl

Wojciech Mech and Piotr Piotrowski have contributed equally to this work

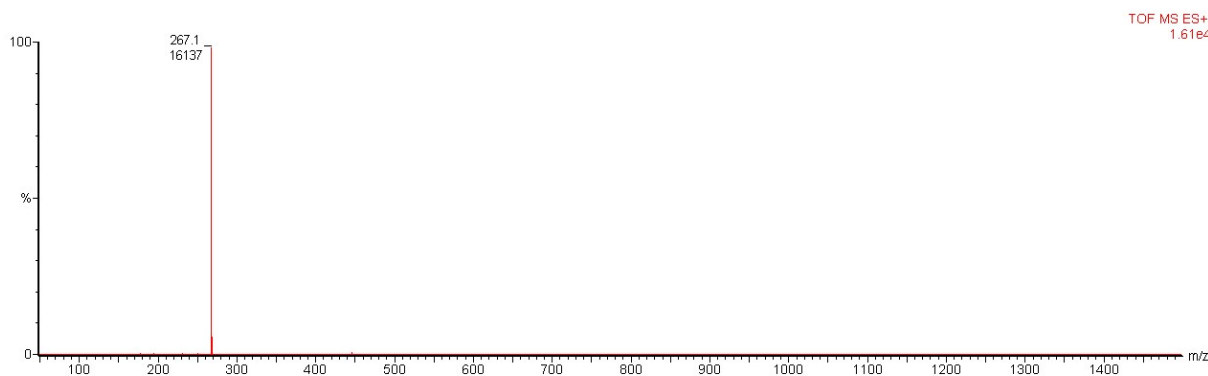

**Figure S1.** ESI-MS spectrum of butyl 3-(1*H*-inden-3-yl)propanoate (IB).

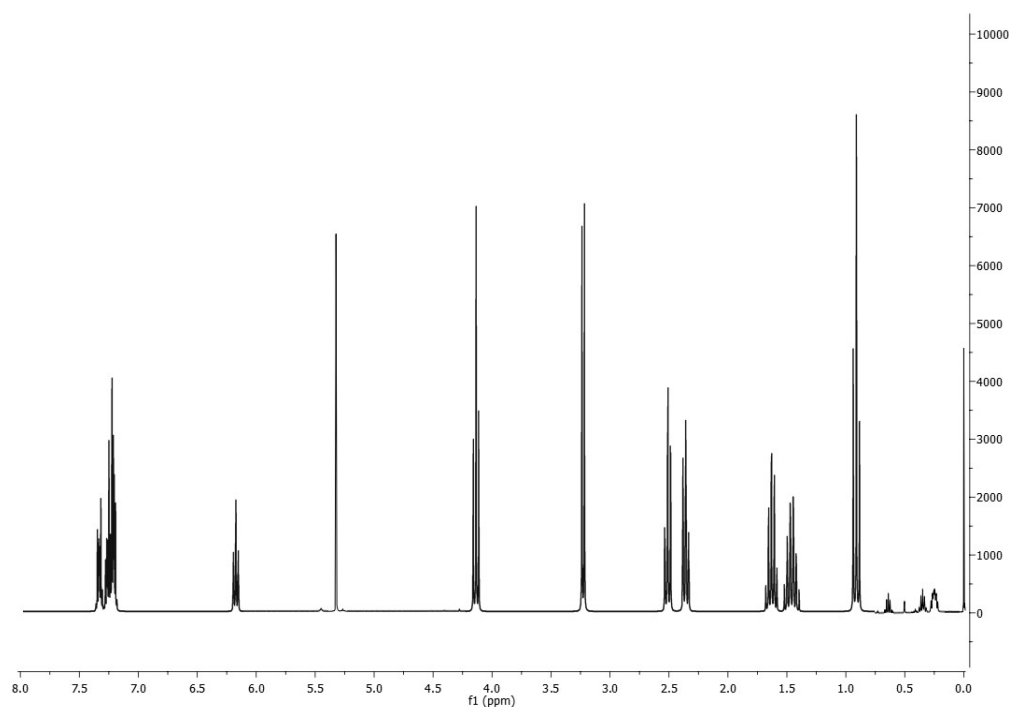

**Figure S2.** <sup>1</sup>H NMR spectrum of butyl 3-(1*H*-inden-3-yl)propanoate (IB).

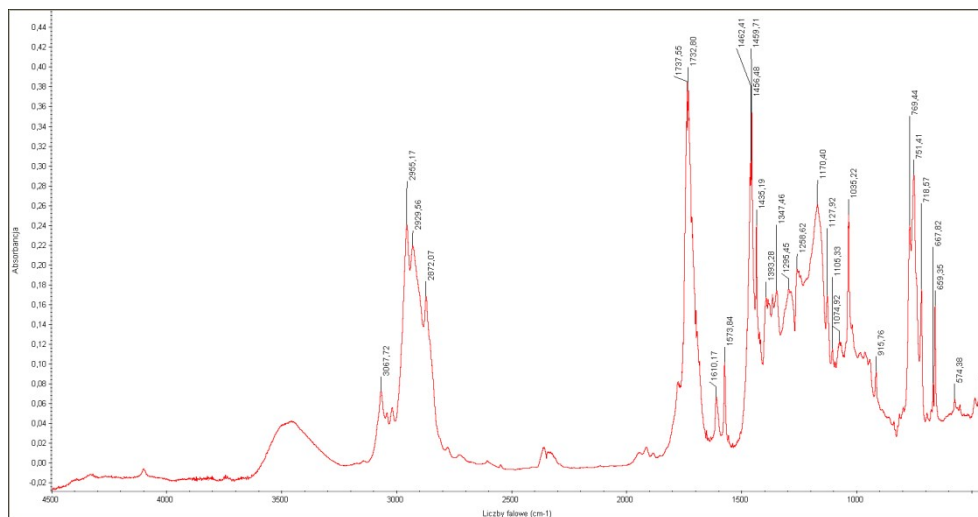

**Figure S3.** FT-IR spectrum of butyl 3-(1*H*-inden-3-yl)propanoate (IB).

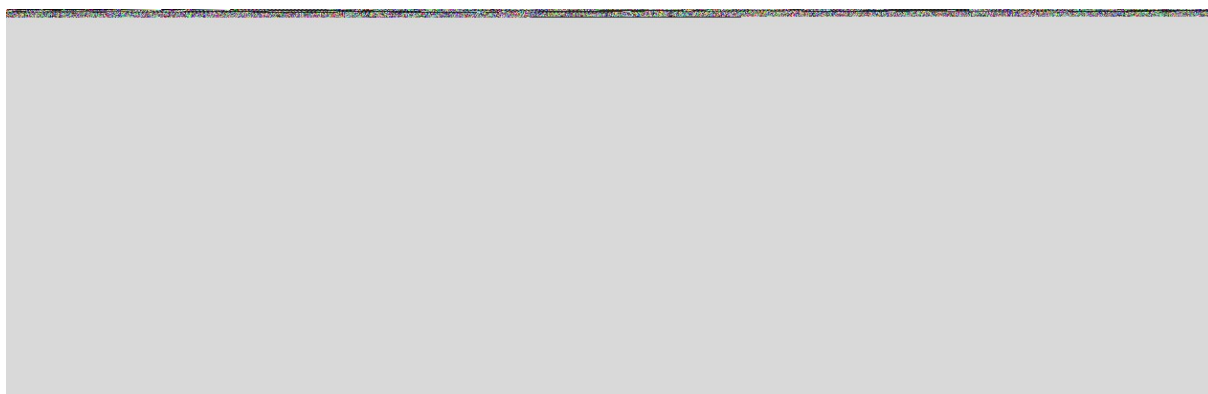

**Figure S4.** ESI-MS spectrum of hexyl 3-(1*H*-inden-3-yl)propanoate (IH).

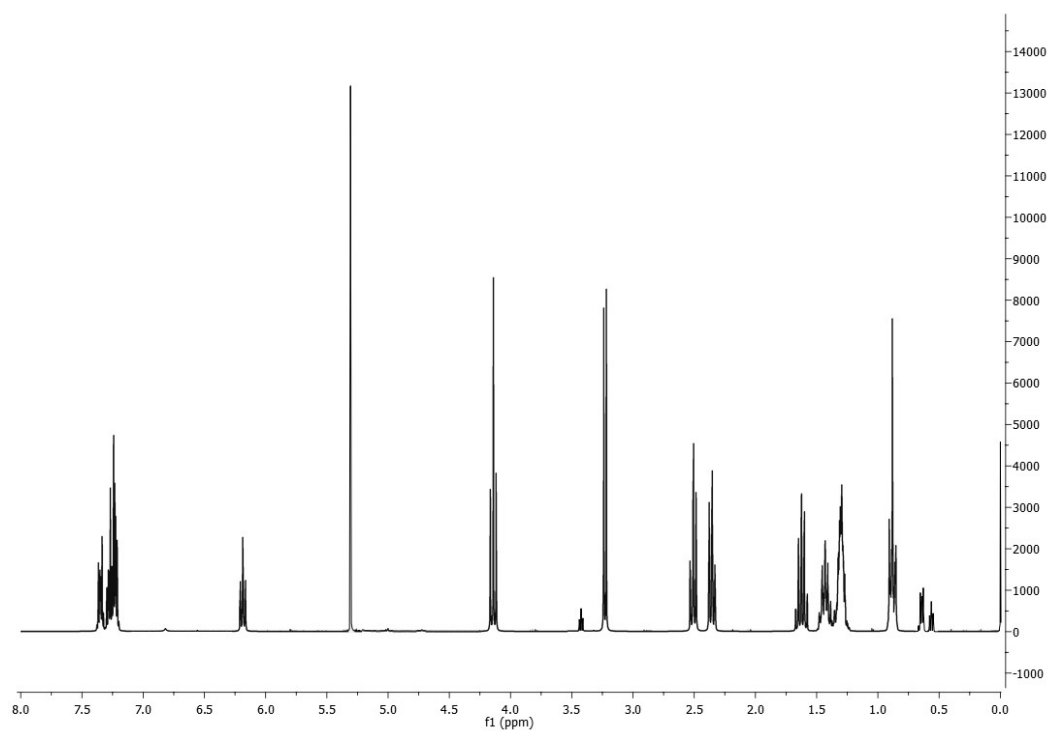

**Figure S5.**  $^1\text{H}$  NMR spectrum of hexyl 3-(1*H*-inden-3-yl)propanoate (IH).

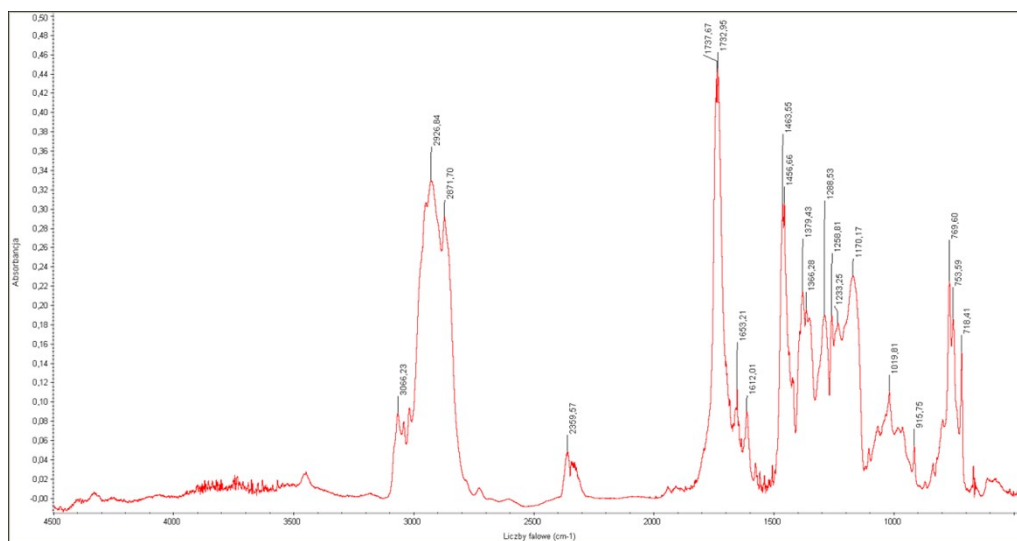

**Figure S6.** FT-IR spectrum of hexyl 3-(1*H*-inden-3-yl)propanoate (IH).

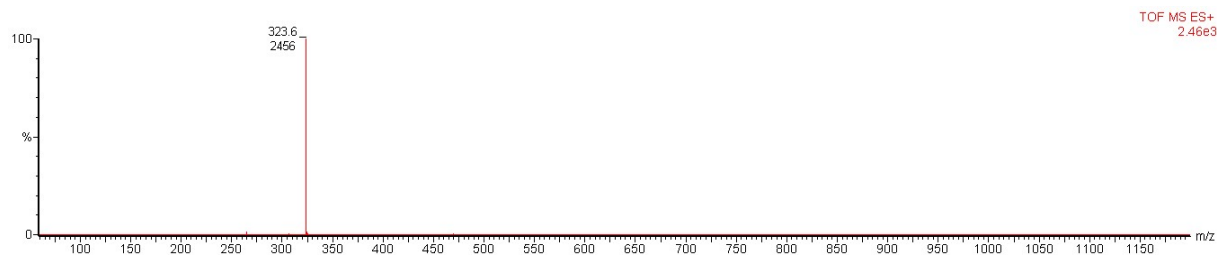

**Figure S7.** ESI-MS spectrum of octyl 3-(1*H*-inden-3-yl)propanoate (IO).

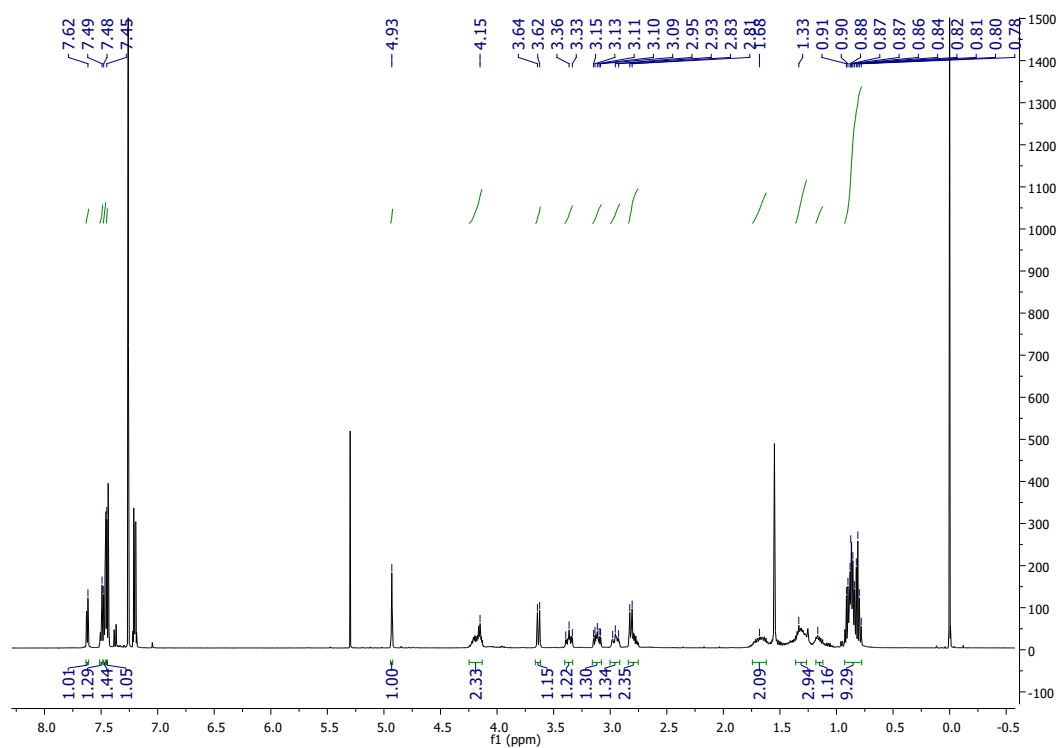

**Figure S8.**  $^1\text{H}$  NMR spectrum of octyl 3-(1*H*-inden-3-yl)propanoate (IO).

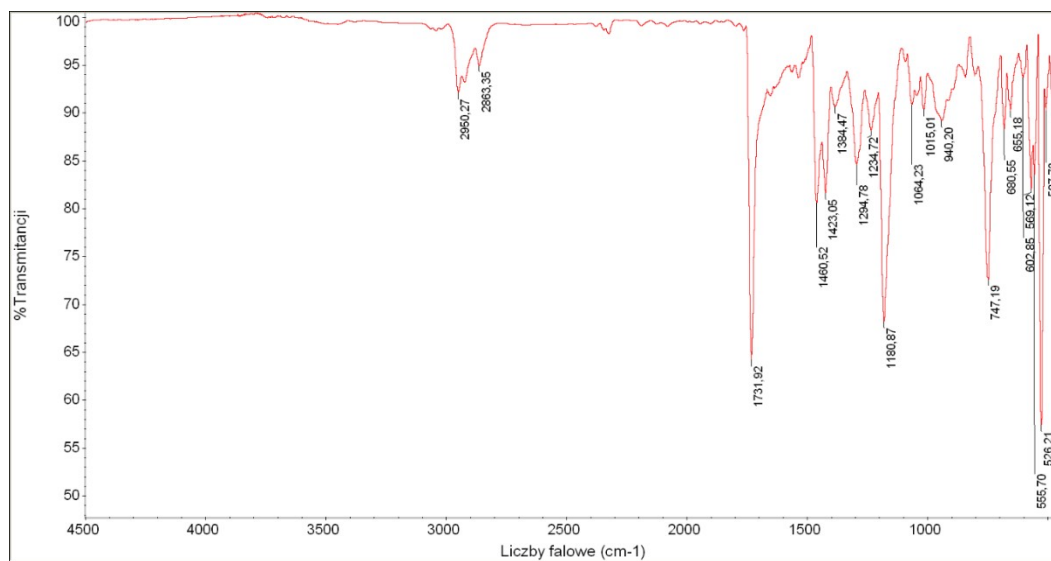

**Figure S9.** FT-IR spectrum of octyl 3-(1*H*-inden-3-yl)propanoate (IO).

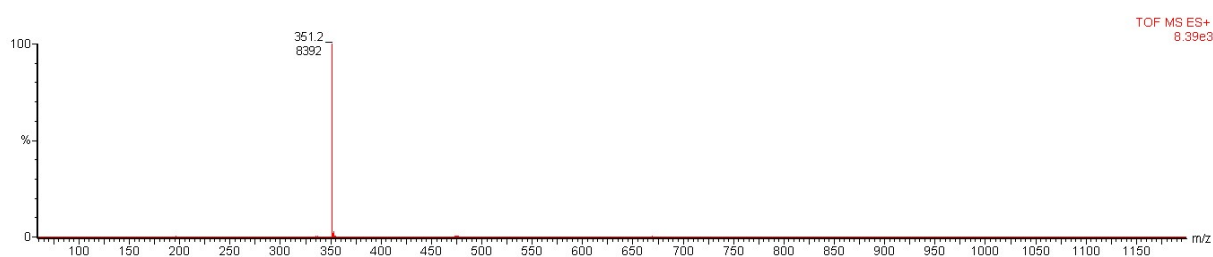

**Figure S10.** ESI-MS spectrum of decyl 3-(1*H*-inden-3-yl)propanoate (ID).

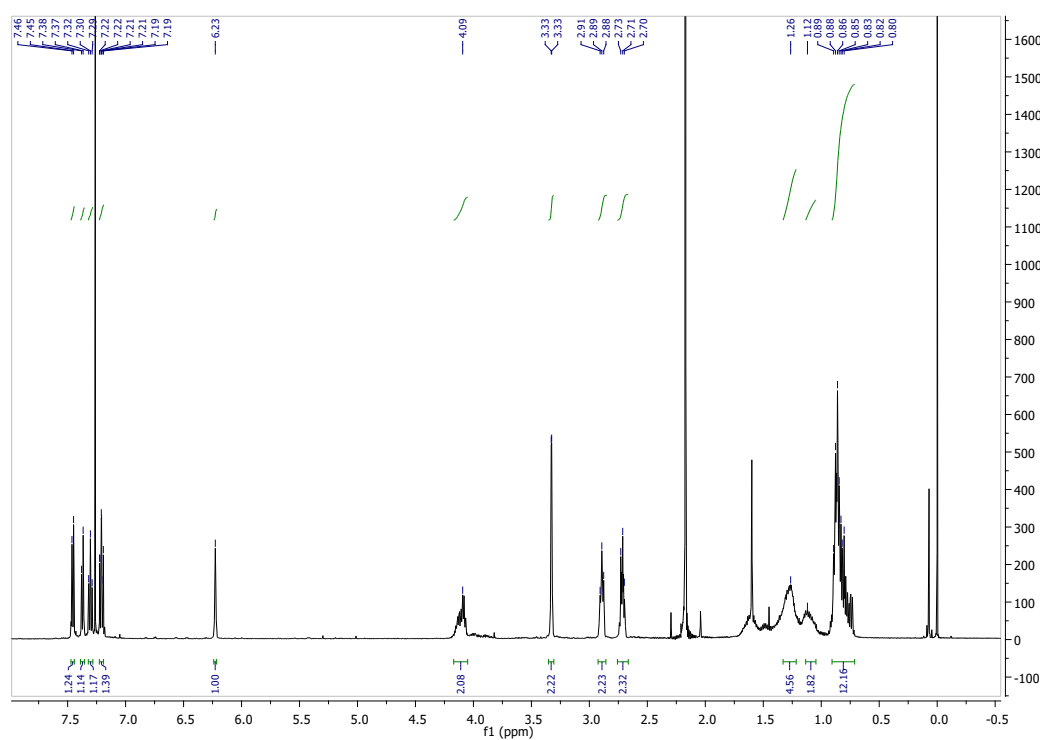

**Figure S11.**  $^1\text{H}$  NMR spectrum of decyl 3-(1*H*-inden-3-yl)propanoate (ID).

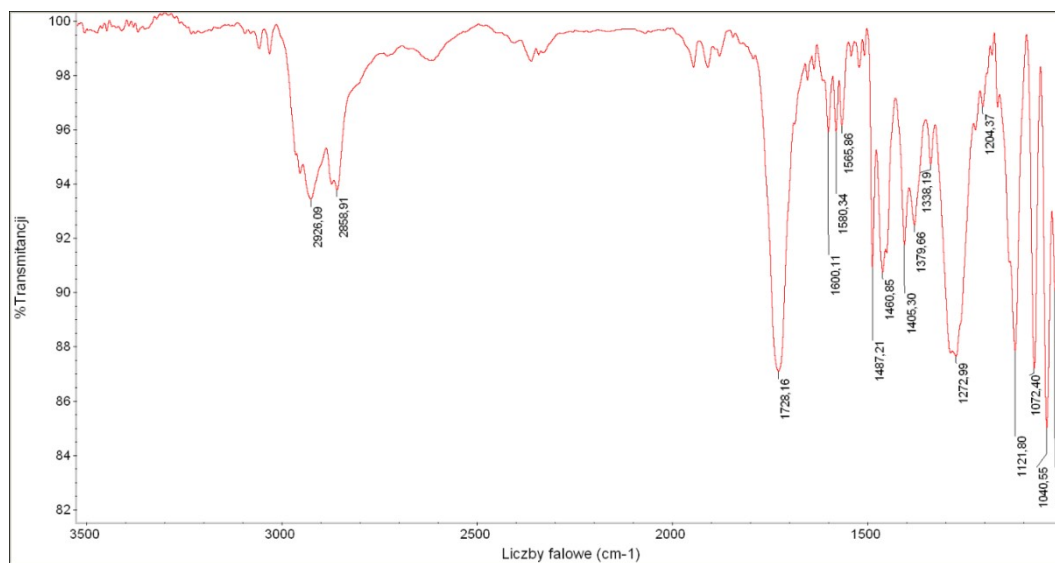

**Figure S12.** FT-IR spectrum of decyl 3-(1*H*-inden-3-yl)propanoate (ID).

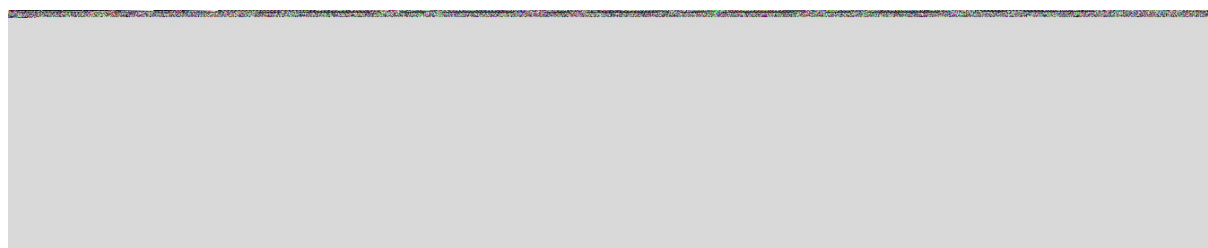

**Figure S13.** ESI-MS spectrum of lauryl 3-(1*H*-inden-3-yl)propanoate (IL)

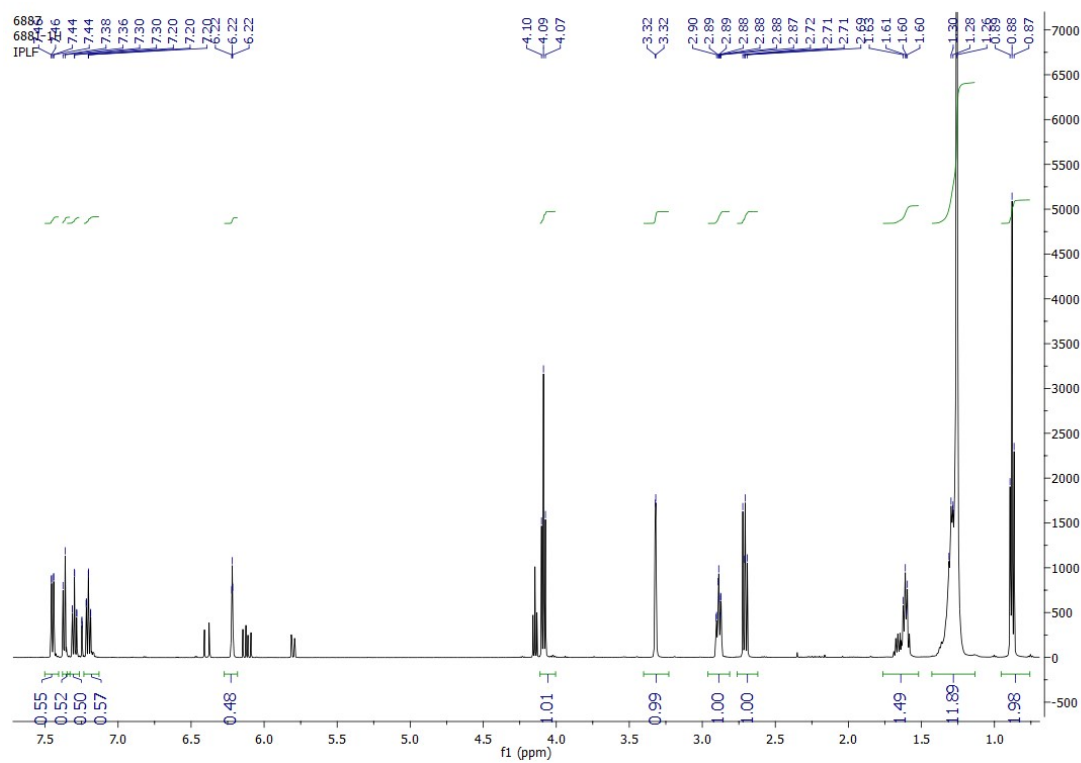

**Figure S14.**  $^1\text{H}$  NMR spectrum of lauryl 3-(1*H*-inden-3-yl)propanoate (IL).

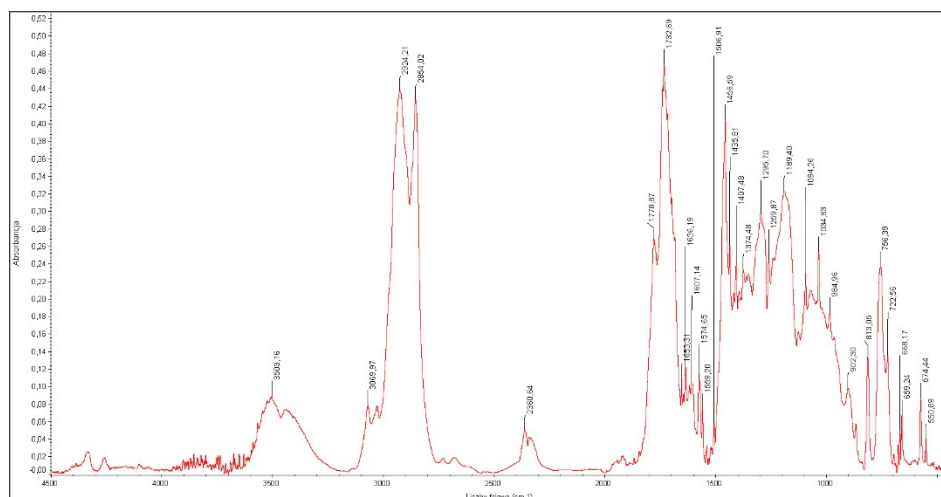

**Figure S15.** FT-IR spectrum of lauryl 3-(1*H*-inden-3-yl)propanoate (IL).

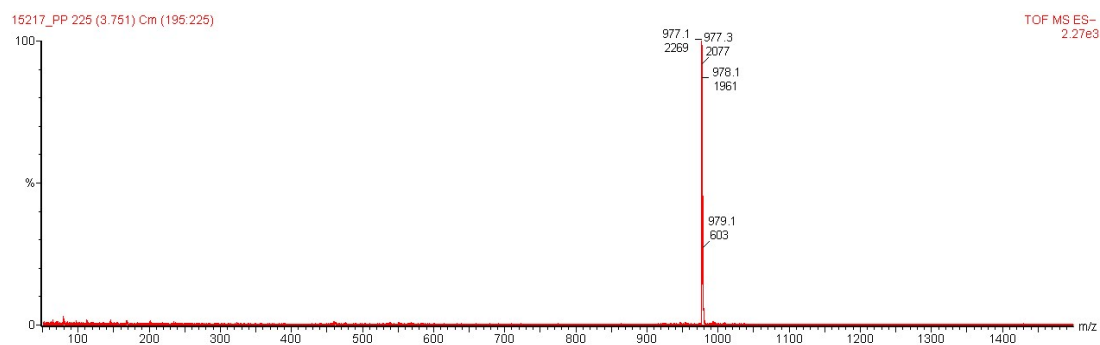

**Figure S16.** ESI-MS spectrum of 60IPB fullerene derivative.

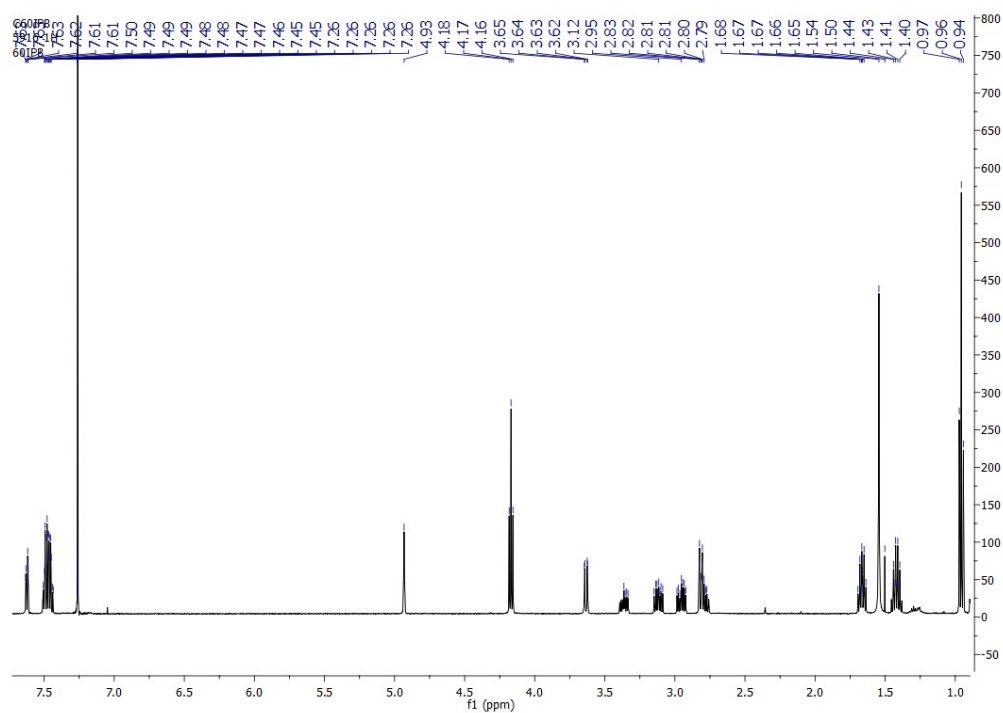

**Figure S17.**  $^1\text{H}$  NMR spectrum of **60IPB** fullerene derivative.

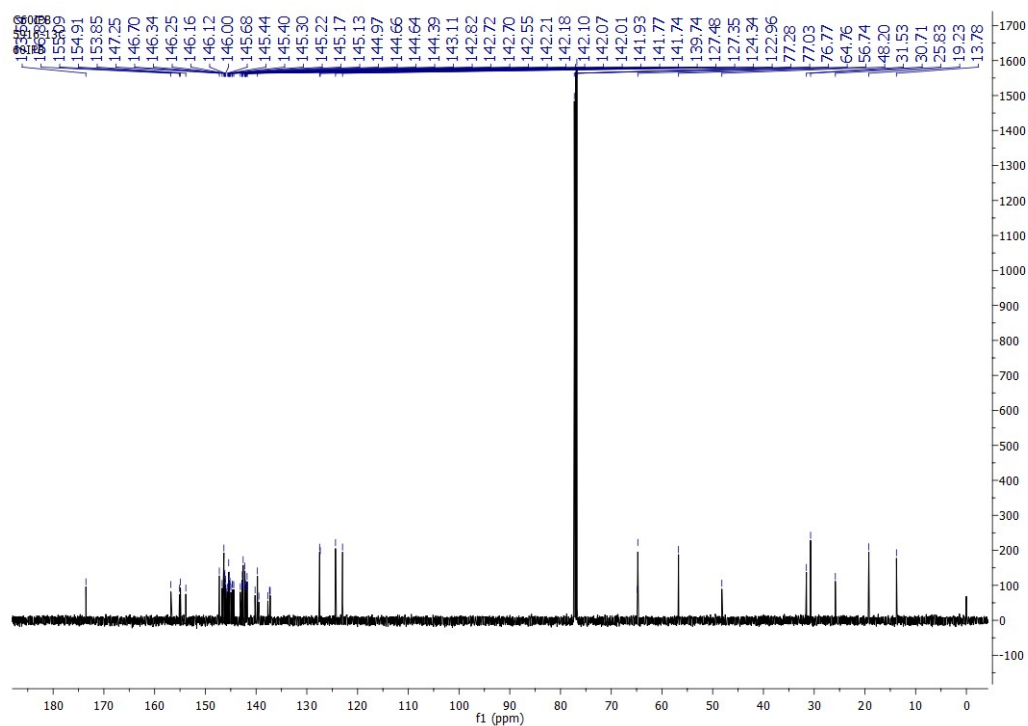

**Figure S18.**  $^{13}\text{C}$  NMR spectrum of **60IPB** fullerene derivative.

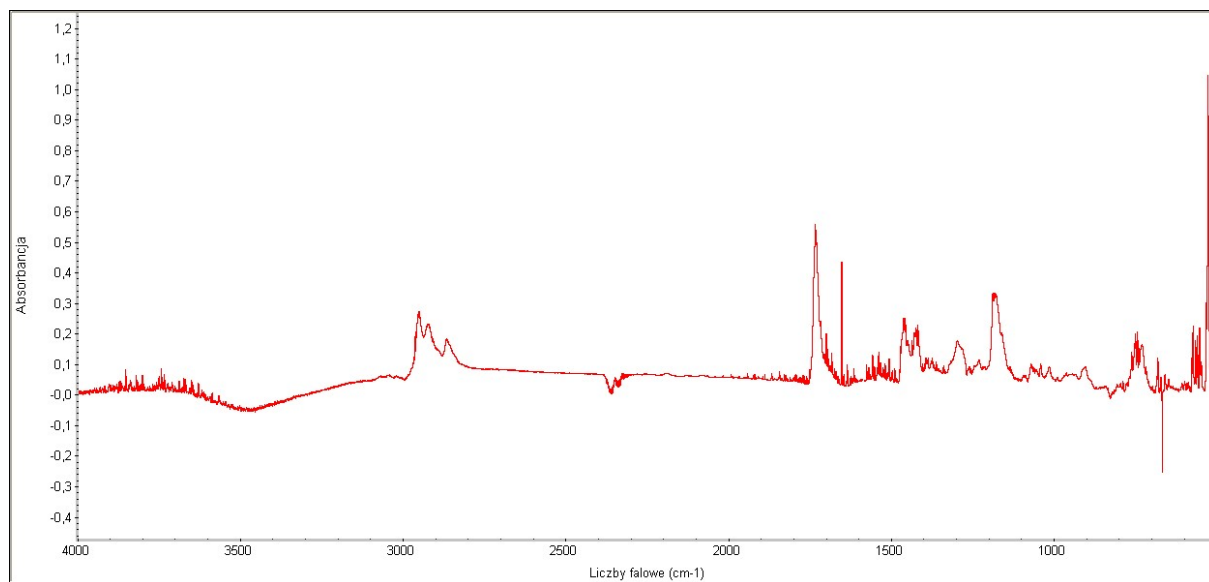

**Figure S19.** FT-IR spectrum of **60IPB** fullerene derivative.

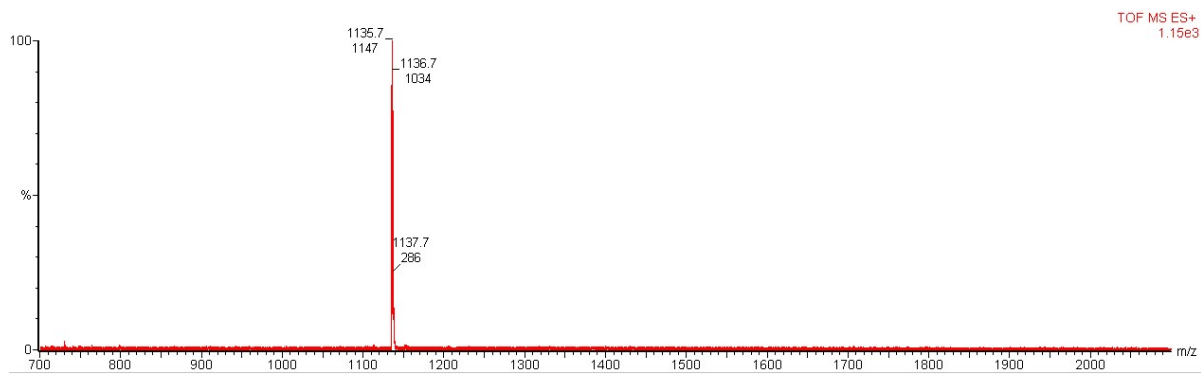

**Figure S20.** ESI-MS spectrum of **70IPB** fullerene derivative.

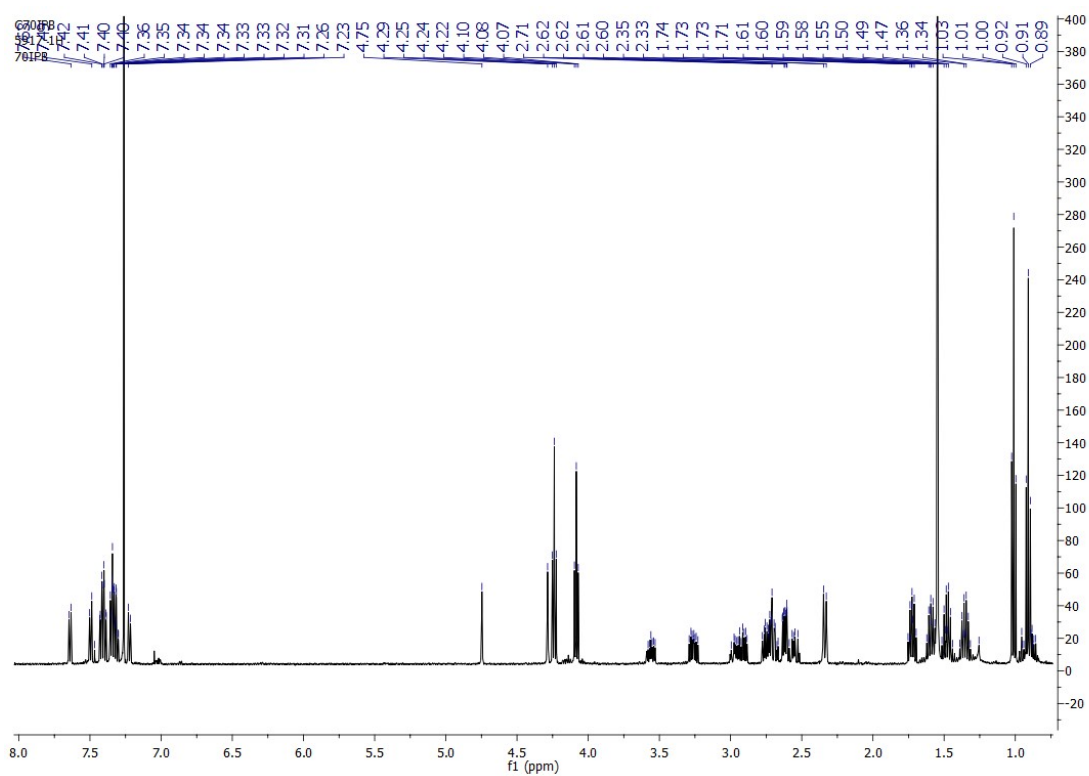

**Figure S21.**  $^1\text{H}$  NMR spectrum of **70IPB** fullerene derivative.



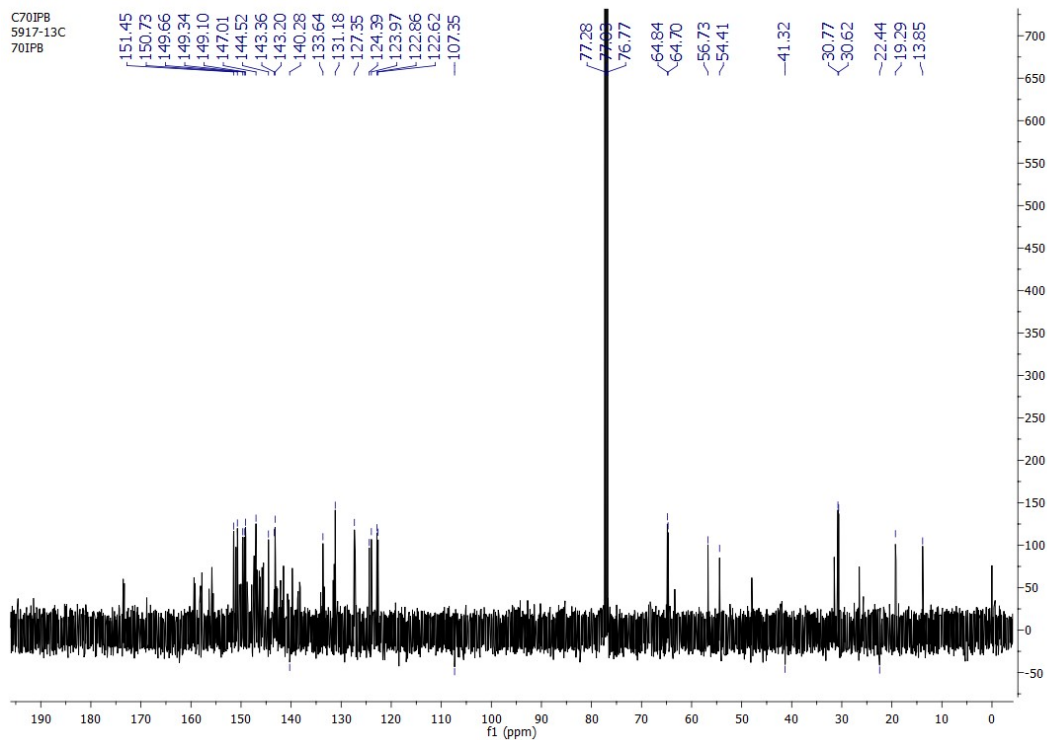

Figure S22.  $^{13}\text{C}$  NMR spectrum of 70IPB fullerene derivative.

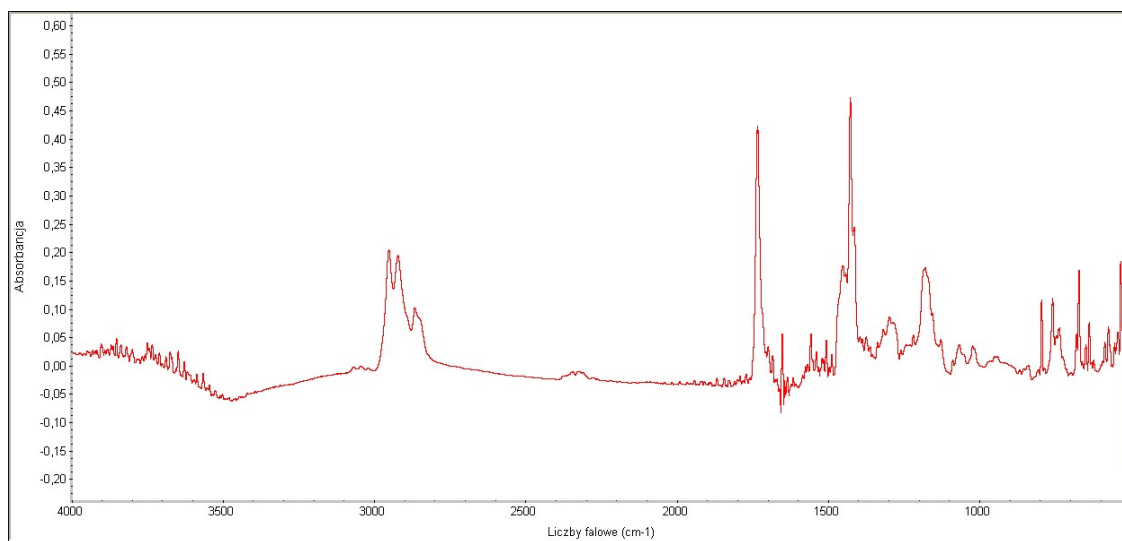

Figure S23. FT-IR spectrum of 70IPB fullerene derivative.

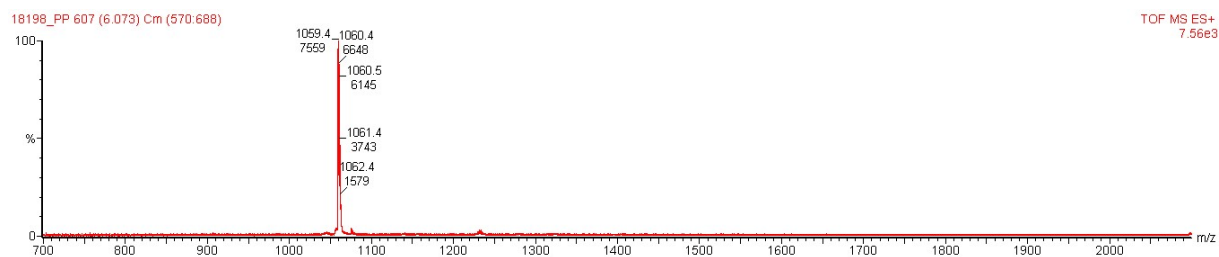

Figure S24. ESI-MS spectrum of 60IPH fullerene derivative.

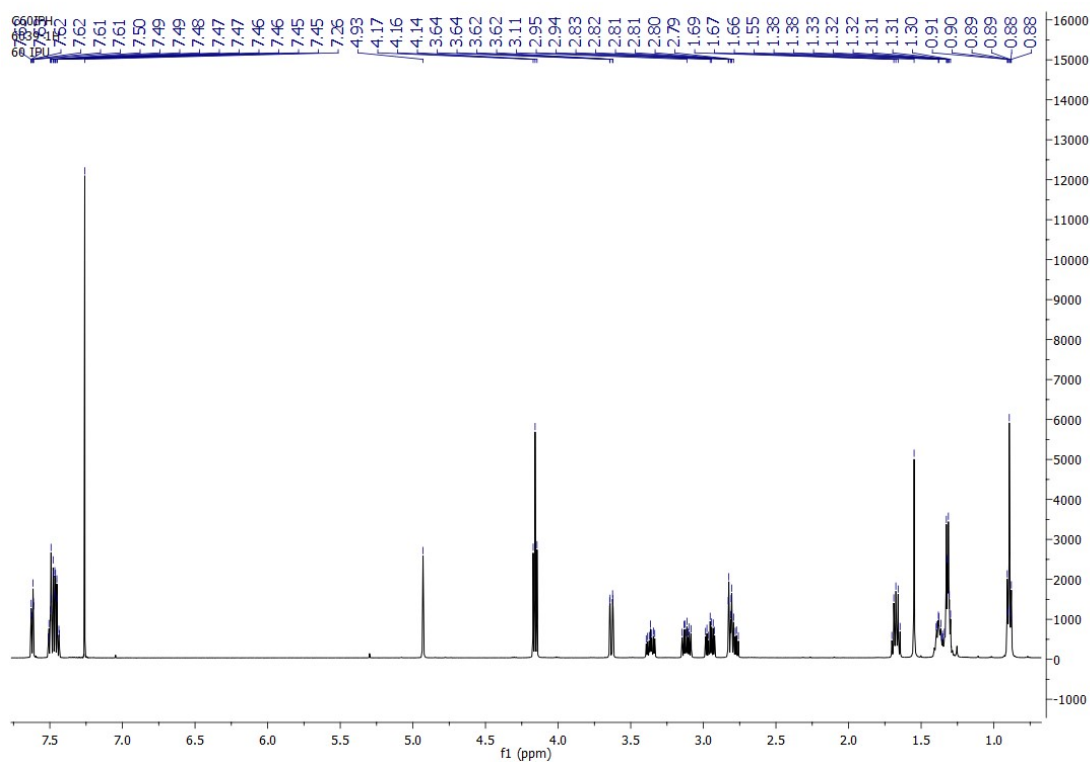

Figure S25. <sup>1</sup>H NMR spectrum of 60IPH fullerene derivative.

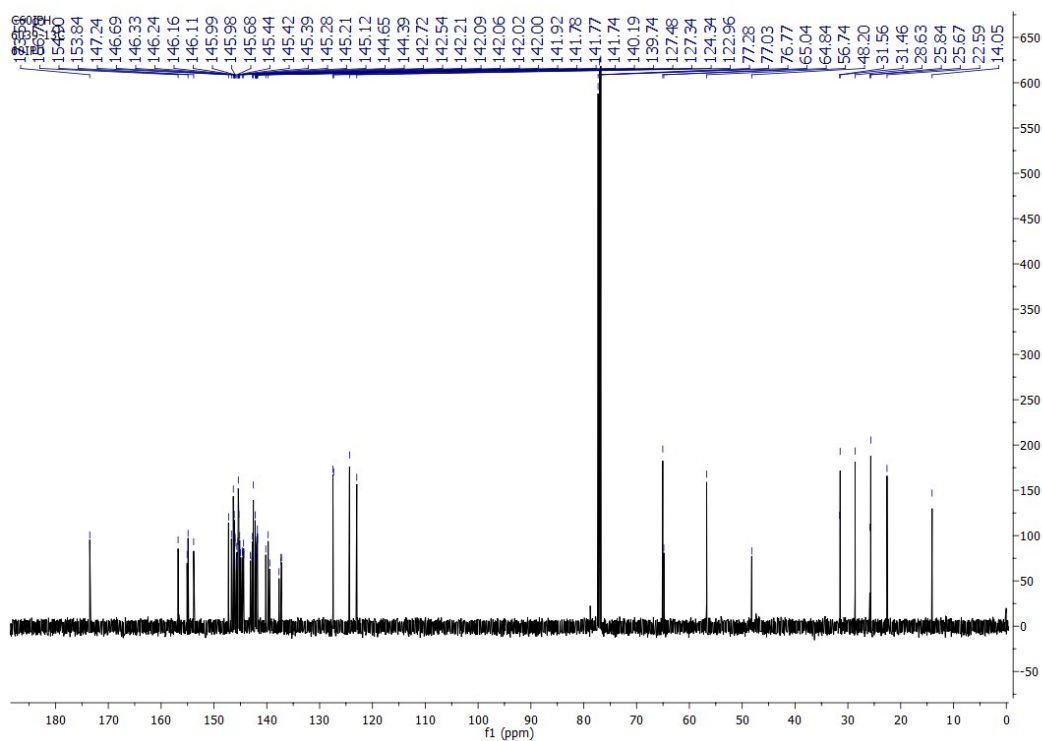

Figure S26. <sup>13</sup>C NMR spectrum of 60IPH fullerene derivative.

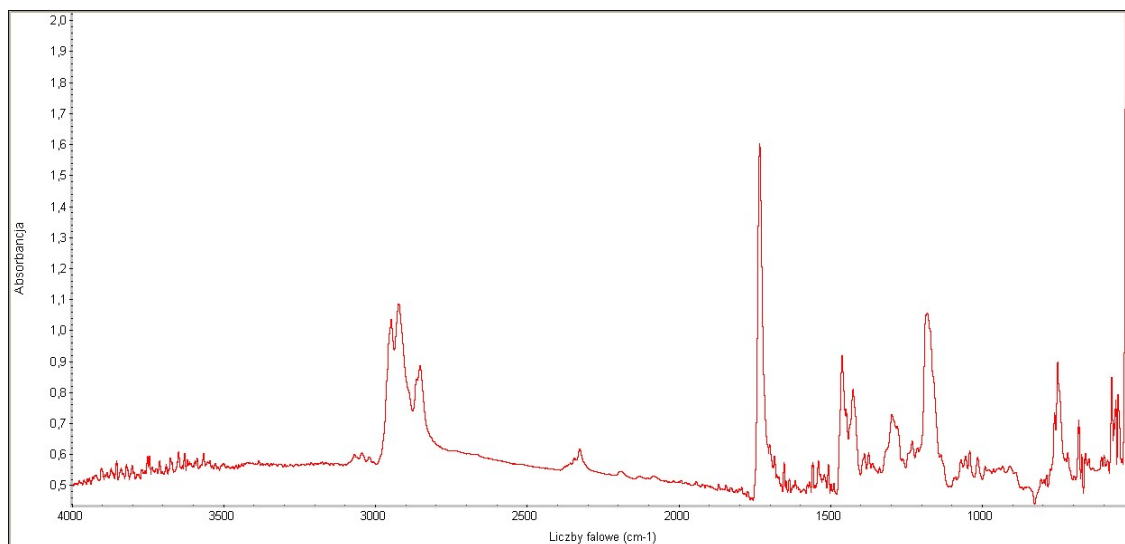

Figure S27. FT-IR spectrum of 60IPH fullerene derivative.

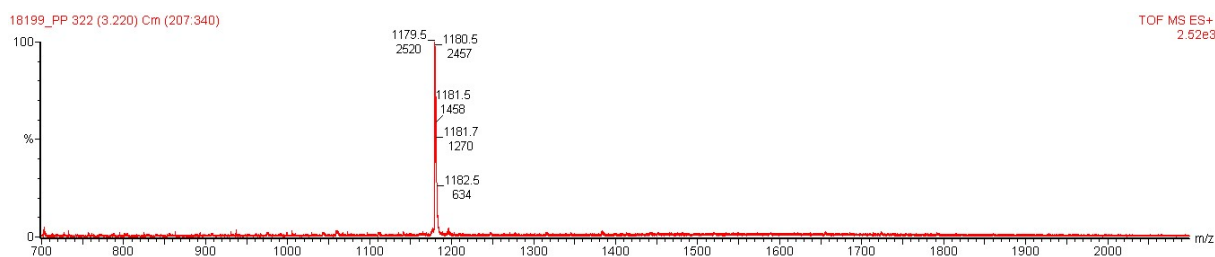

Figure S28. ESI-MS spectrum of 70IPH fullerene derivative.

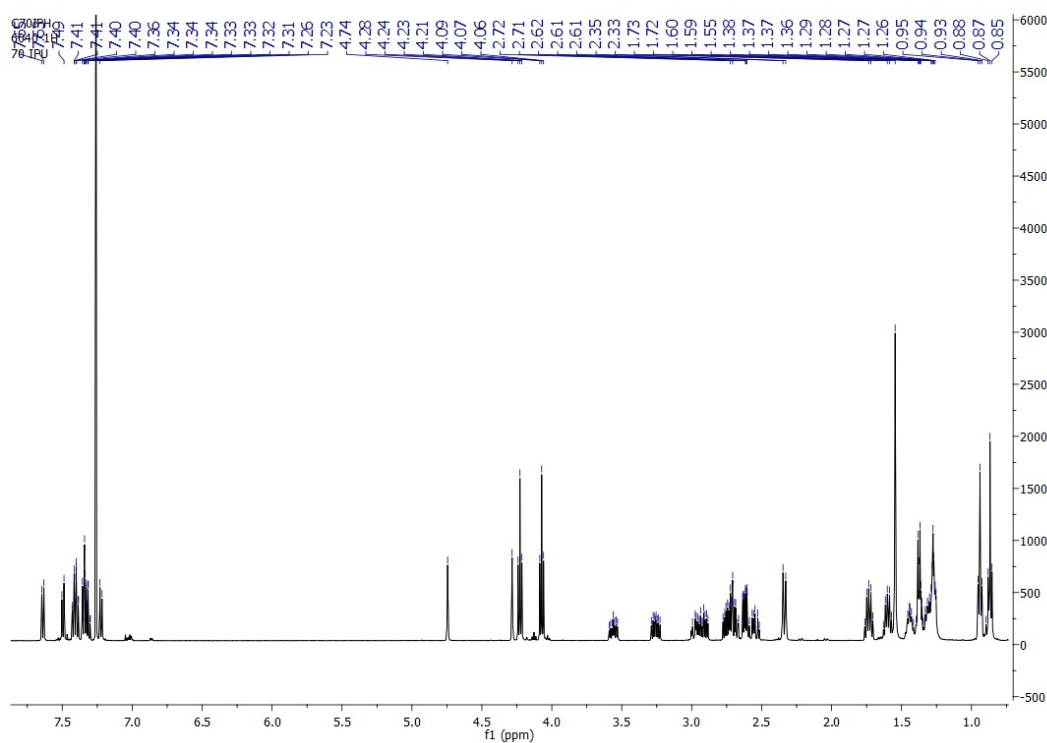

Figure S29.  $^1\text{H}$  NMR spectrum of 70IPH fullerene derivative.

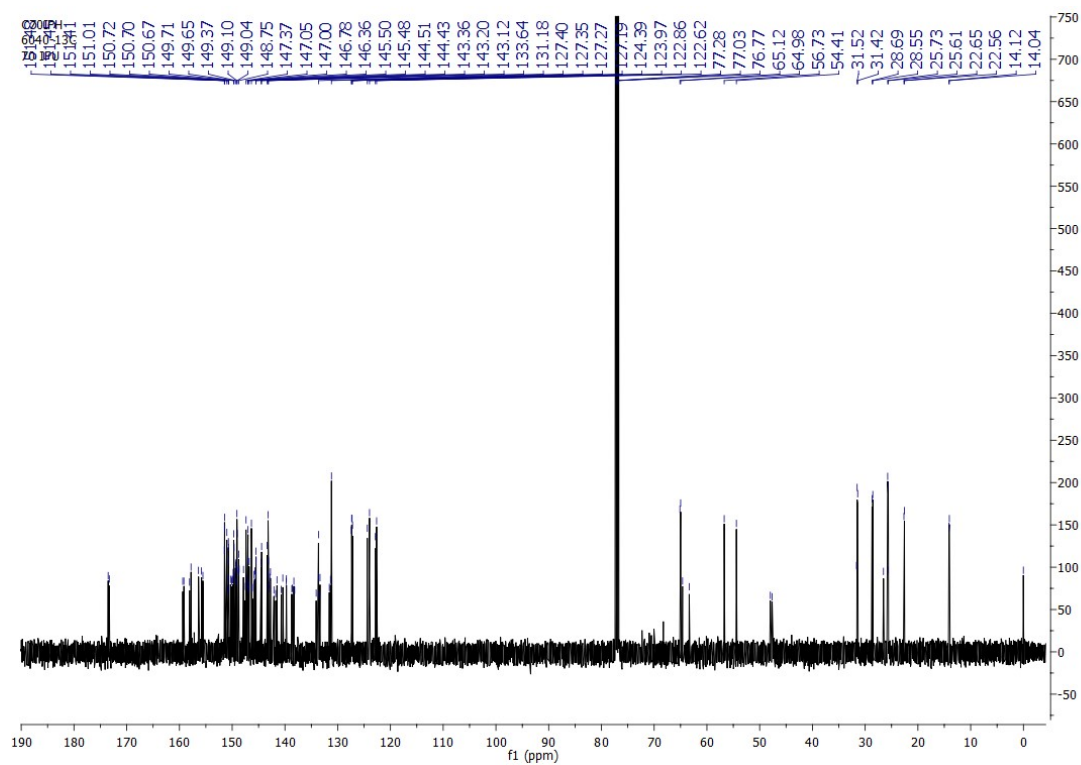

Figure S30.  $^{13}\text{C}$  NMR spectrum of 70IPH fullerene derivative.

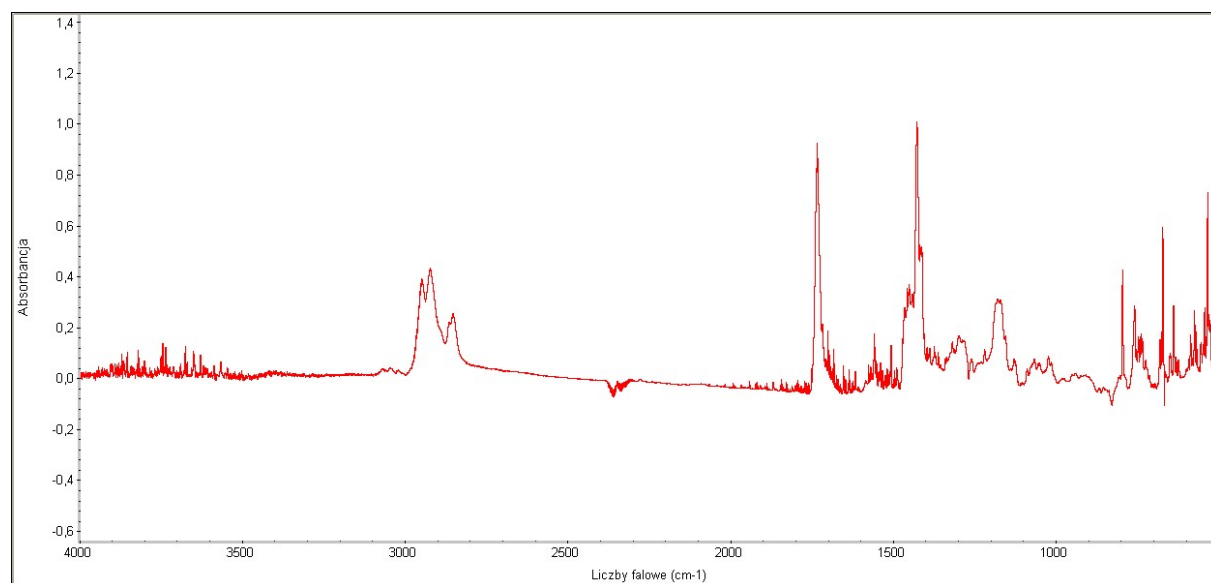

Figure S31. FT-IR spectrum of 70IPH fullerene derivative.

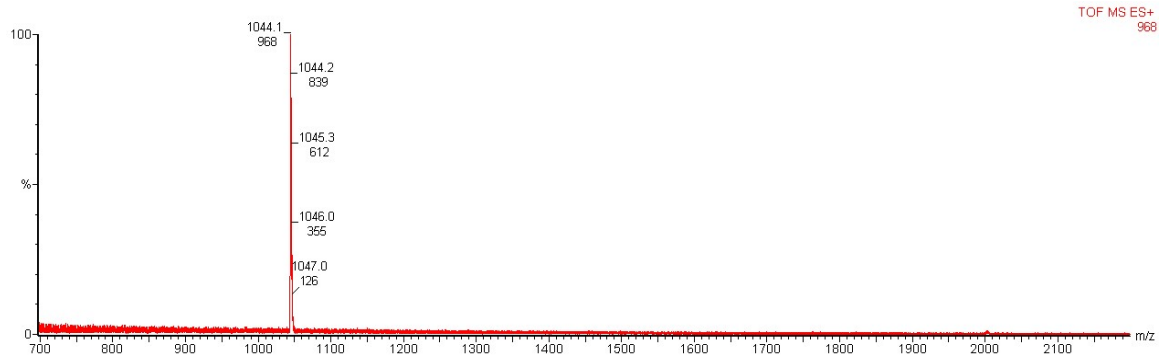

Figure S32. ESI-MS spectrum of **60IPO** fullerene derivative.

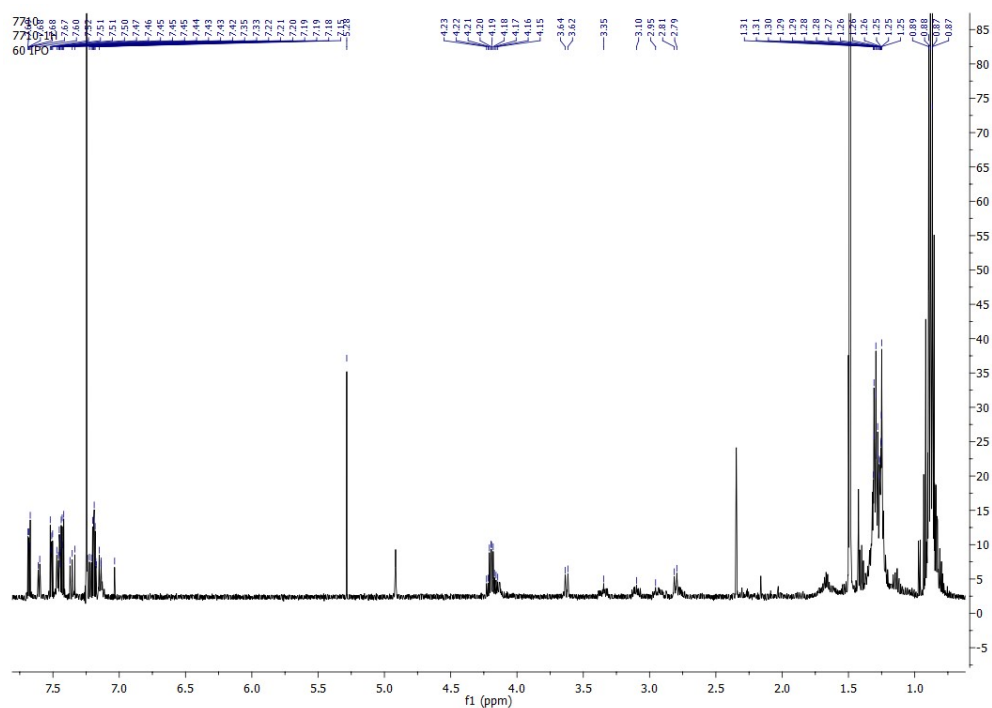

Figure S33. <sup>1</sup>H NMR spectrum of **60IPO** fullerene derivative.

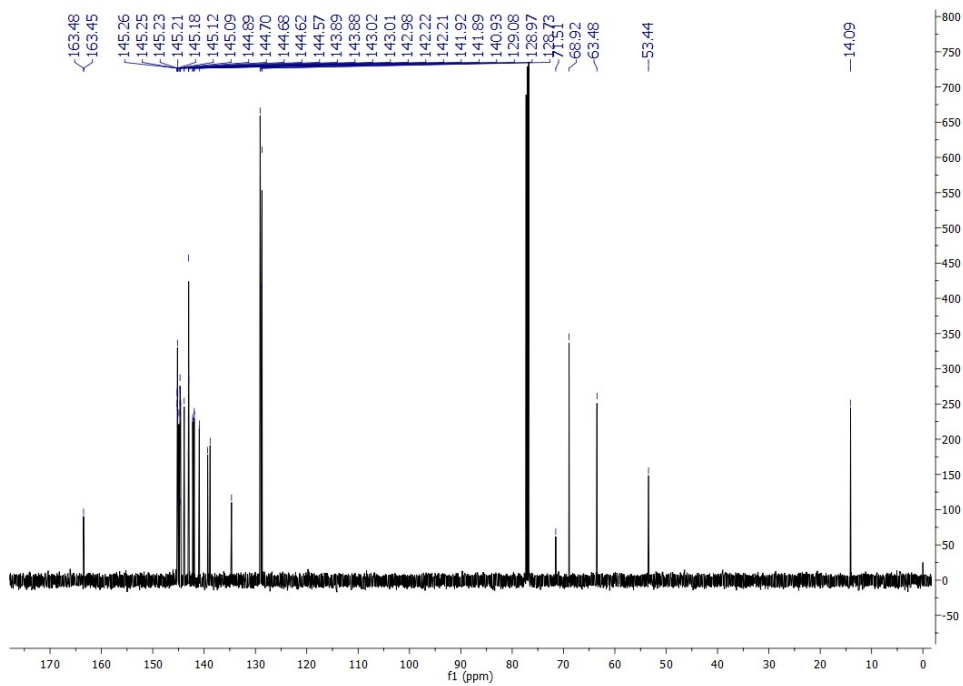

**Figure S34.**  $^{13}\text{C}$  NMR spectrum of 60IPO fullerene derivative.

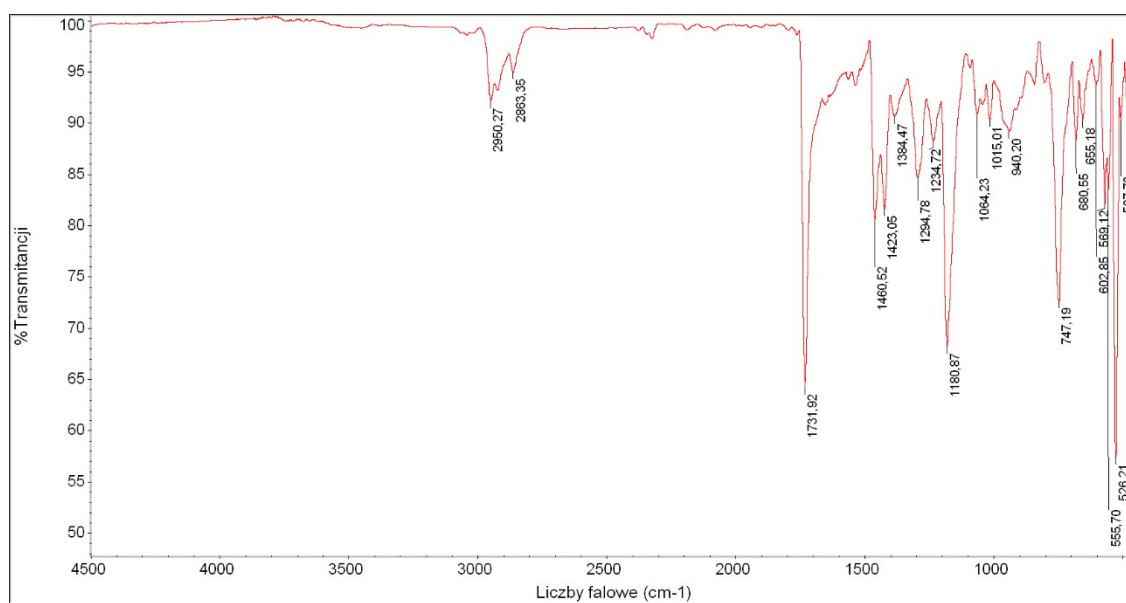

**Figure S35.** FT-IR spectrum of 60IPO fullerene derivative.

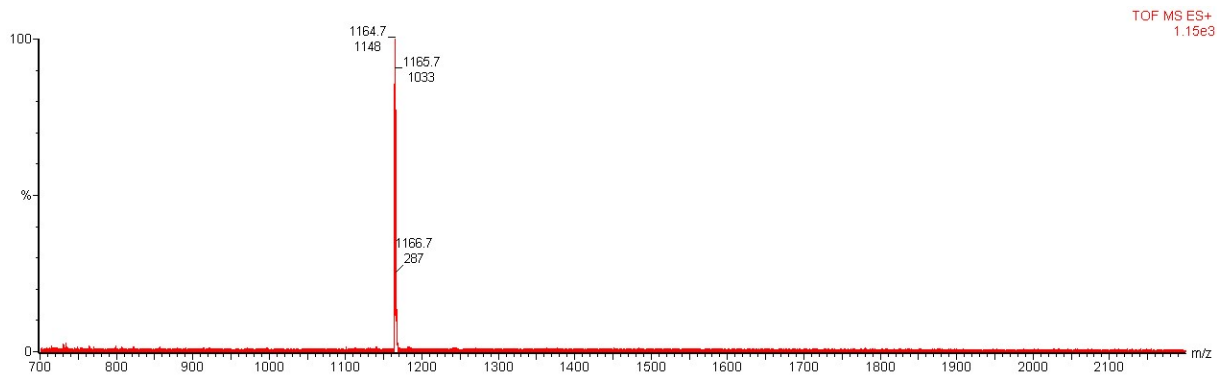

Figure S36. ESI-MS spectrum of **70IPO** fullerene derivative.

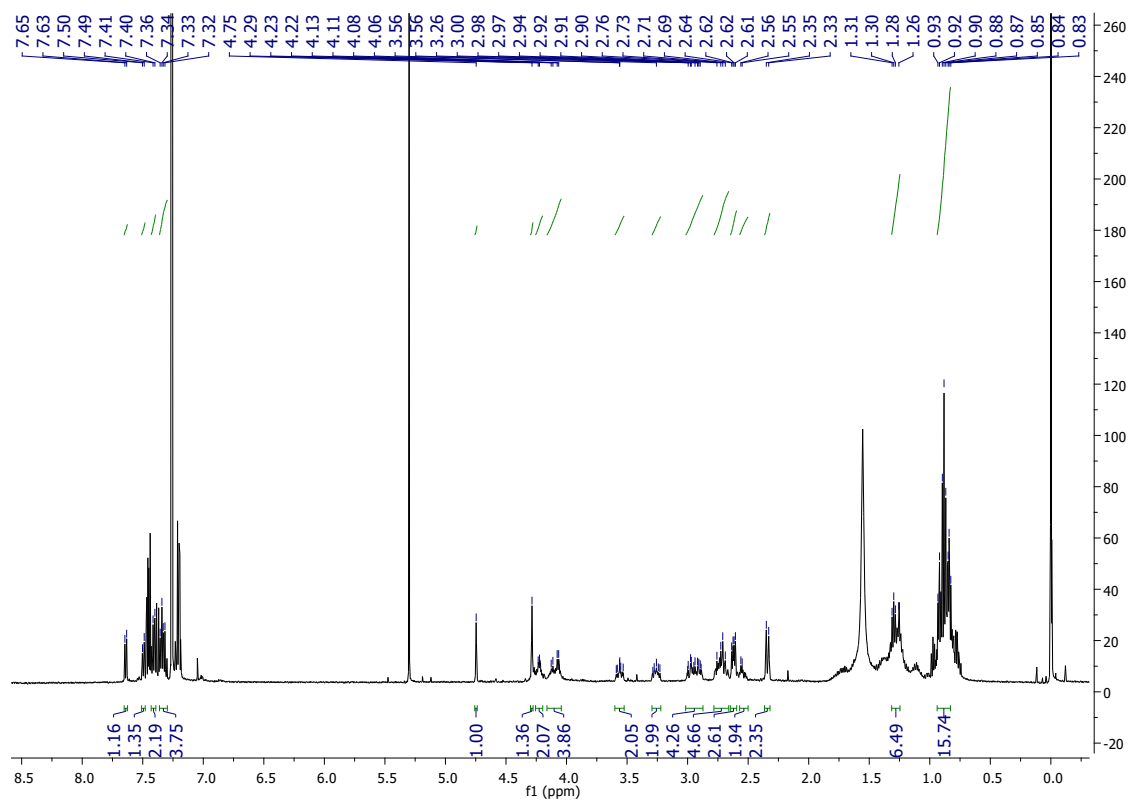

Figure S37.  $^1\text{H}$  NMR spectrum of **70IPO** fullerene derivative.

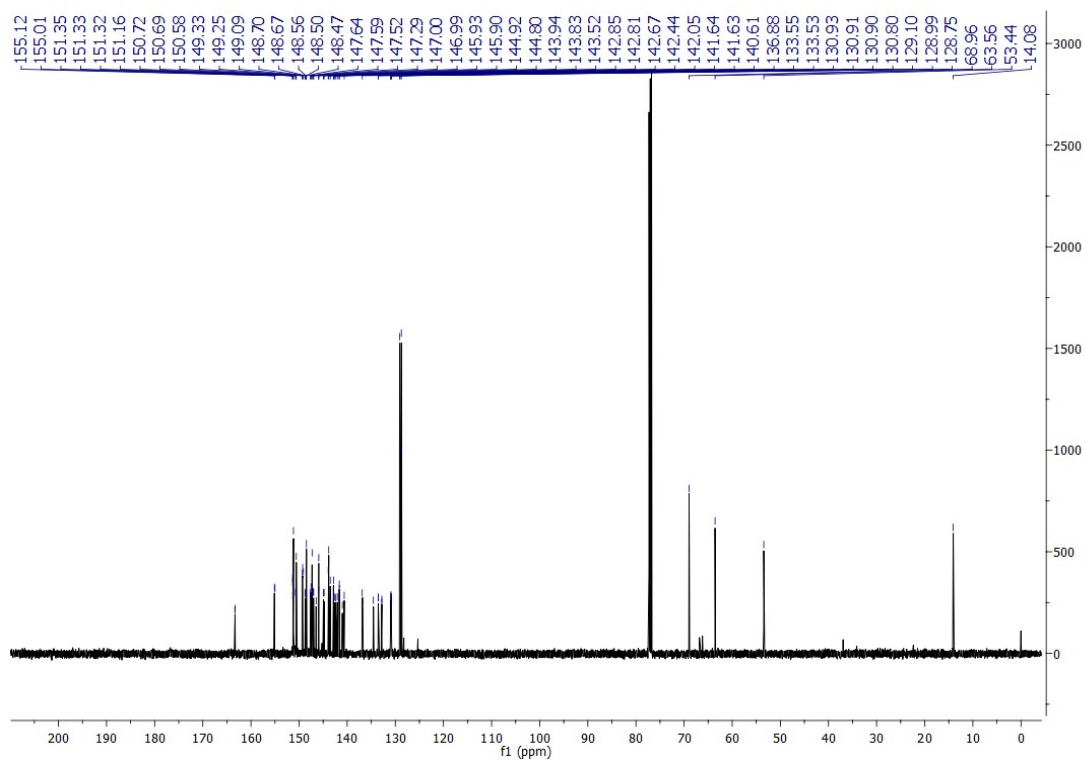

**Figure S38.** <sup>13</sup>C NMR spectrum of 70IPO fullerene derivative.

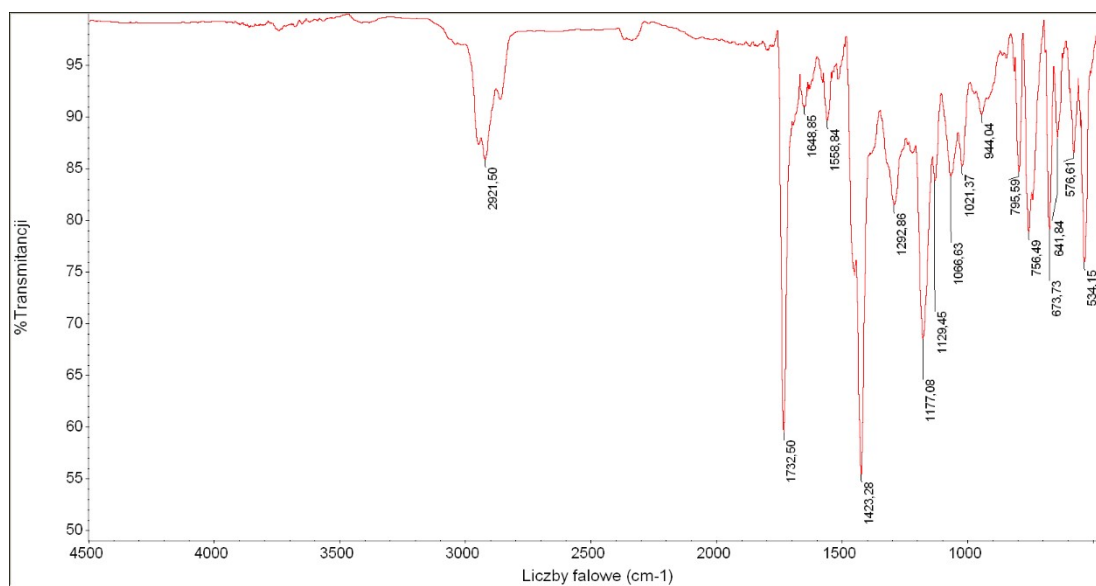

**Figure S39.** FT-IR spectrum of 70IPO fullerene derivative.



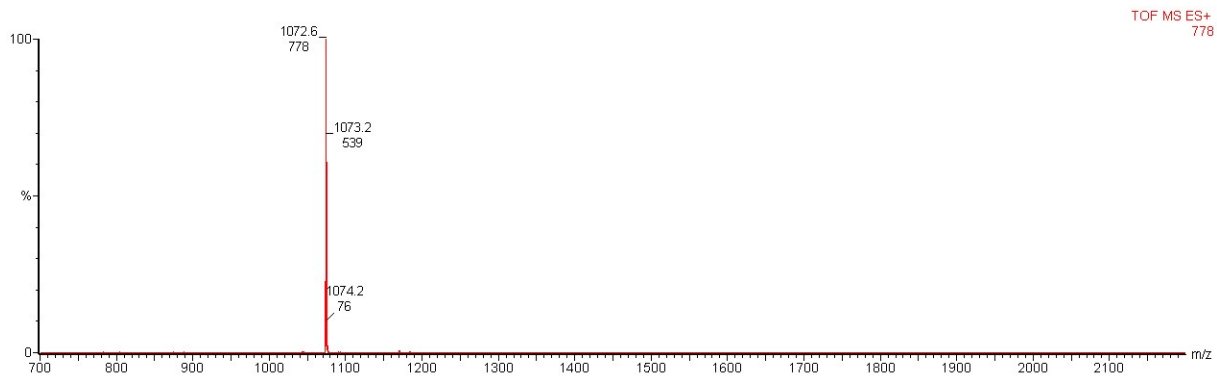

Figure S40. ESI-MS spectrum of **60IPD** fullerene derivative.

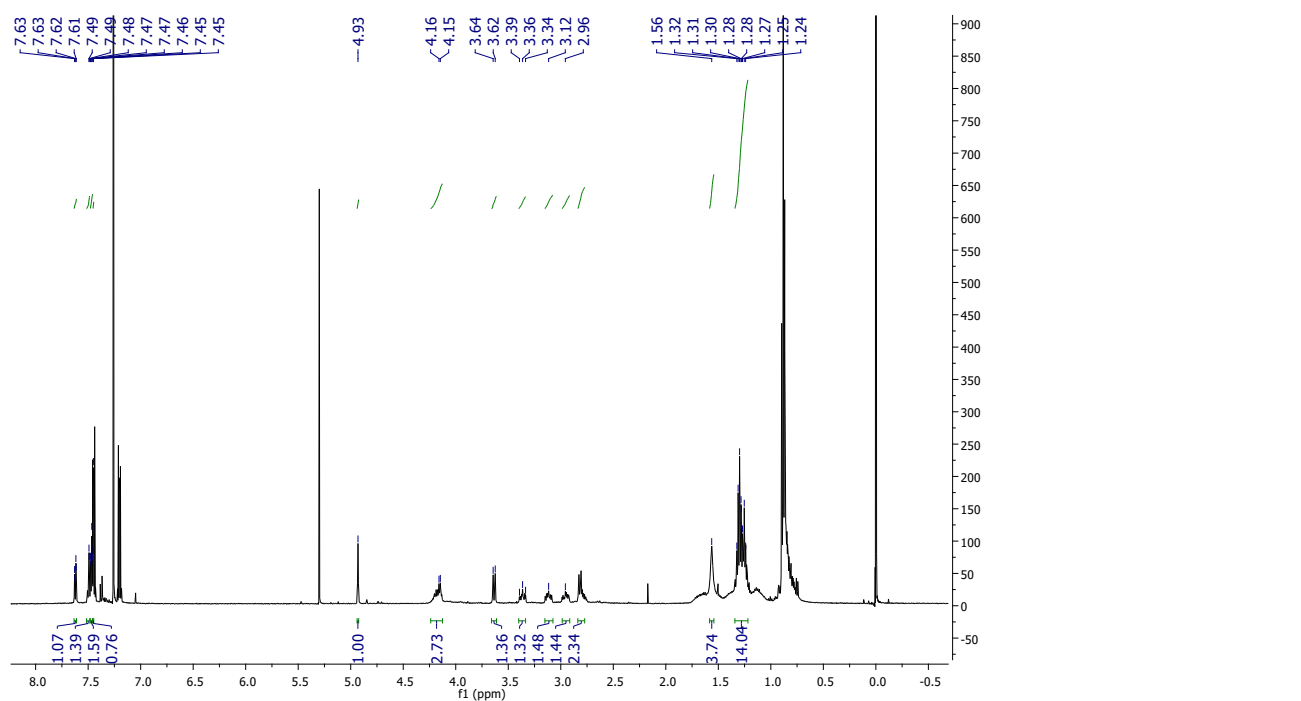

Figure S41.  $^1\text{H}$  NMR spectrum of **60IPD** fullerene derivative.

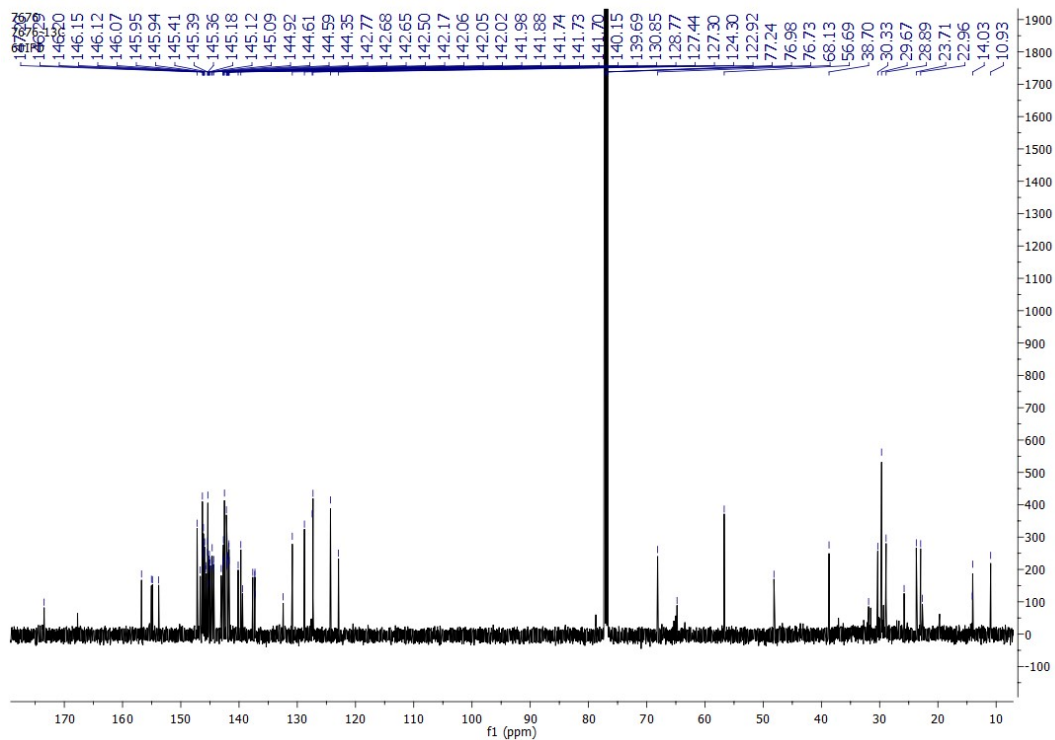

Figure S42.  $^{13}\text{C}$  NMR spectrum of **60IPD** fullerene derivative.

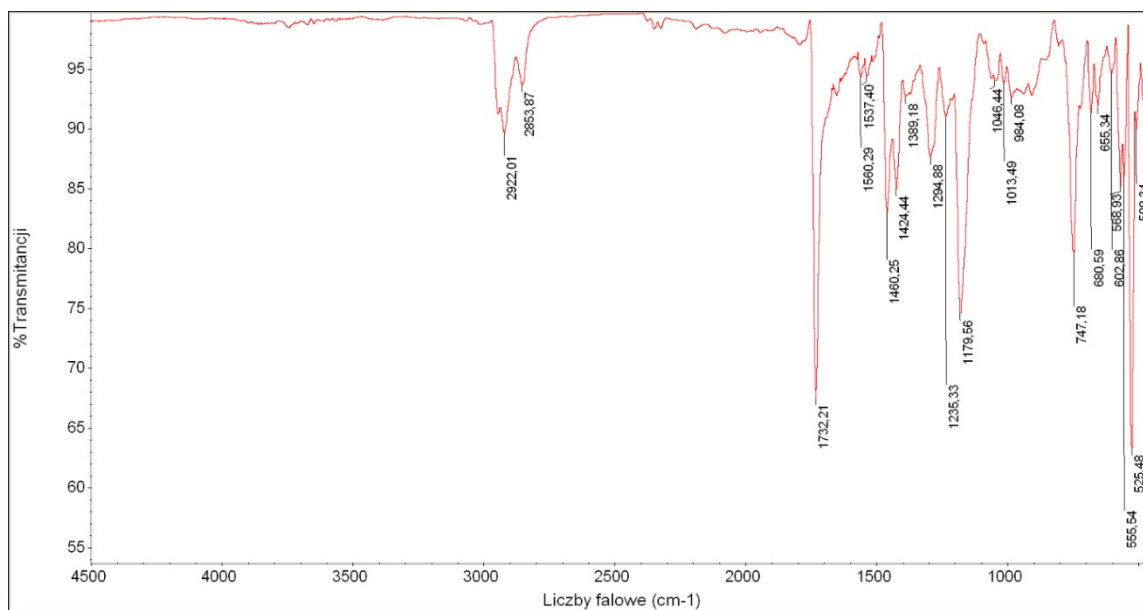

Figure S43. FT-IR spectrum of **60IPD** fullerene derivative.

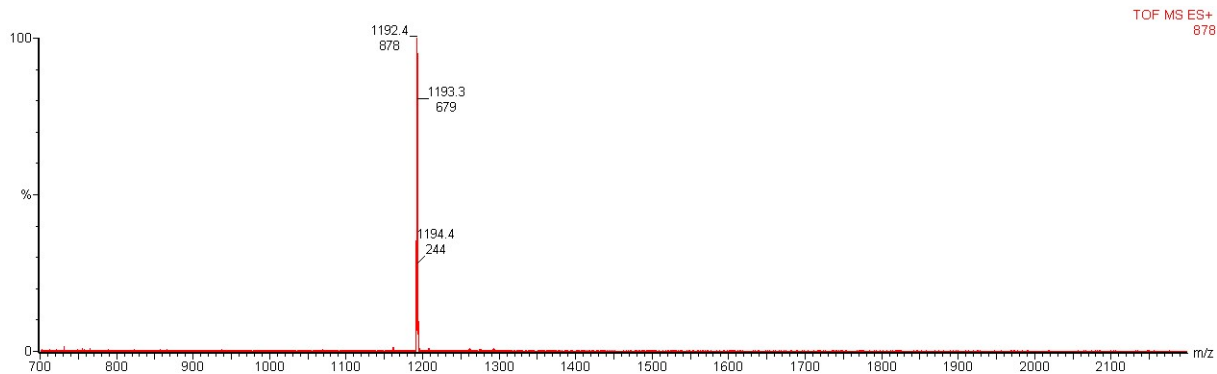

**Figure S44.** ESI-MS spectrum of **70IPD** fullerene derivative.

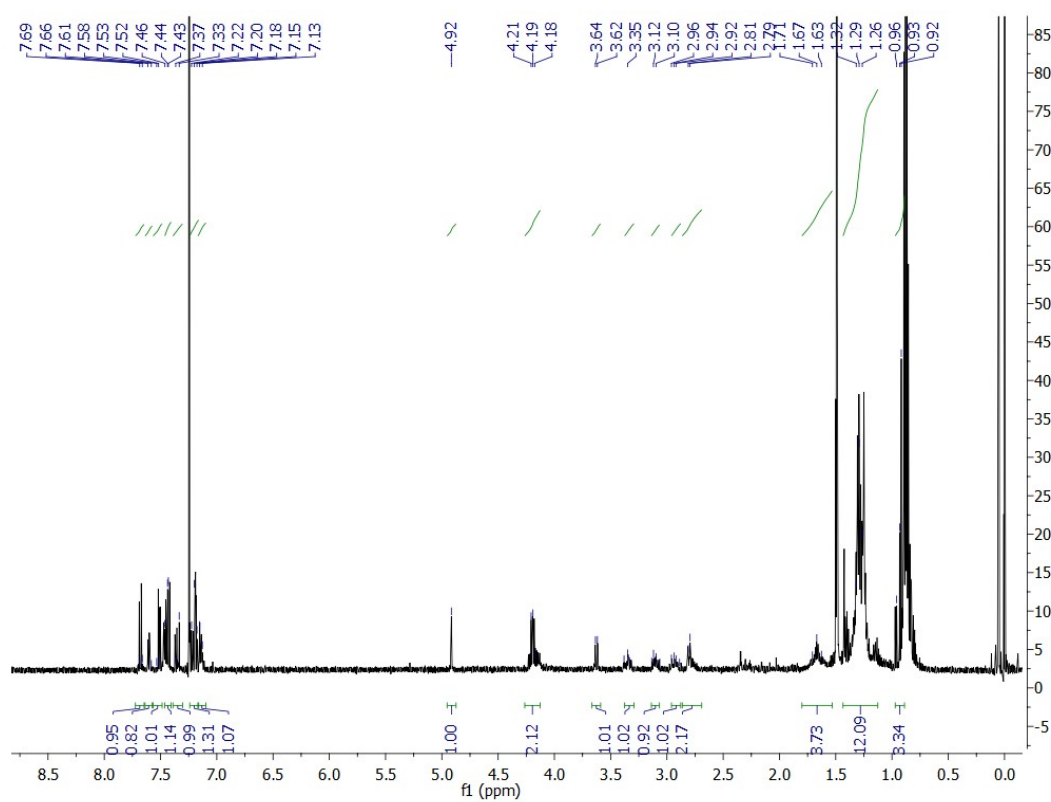

**Figure S45.**  $^1\text{H}$  NMR spectrum of **70IPD** fullerene derivative.

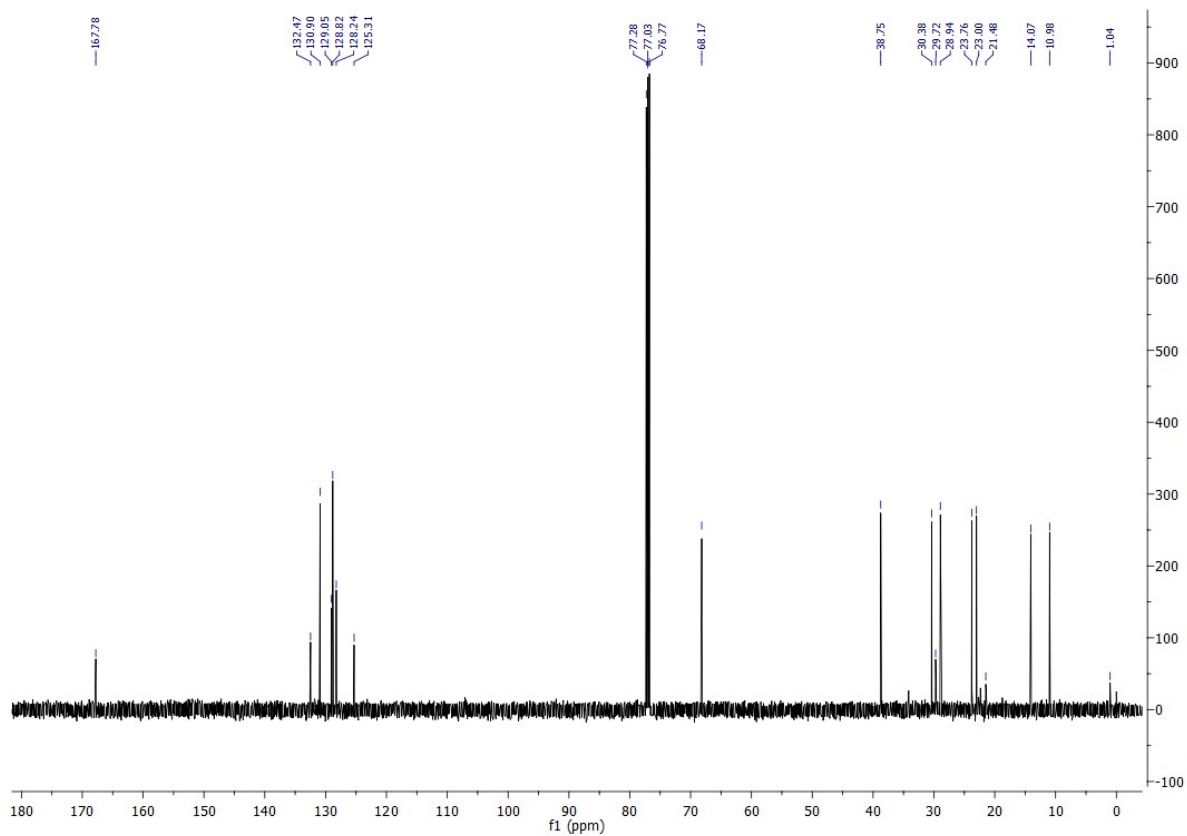

Figure S46.  $^{13}\text{C}$  NMR spectrum of 70IPD fullerene derivative.

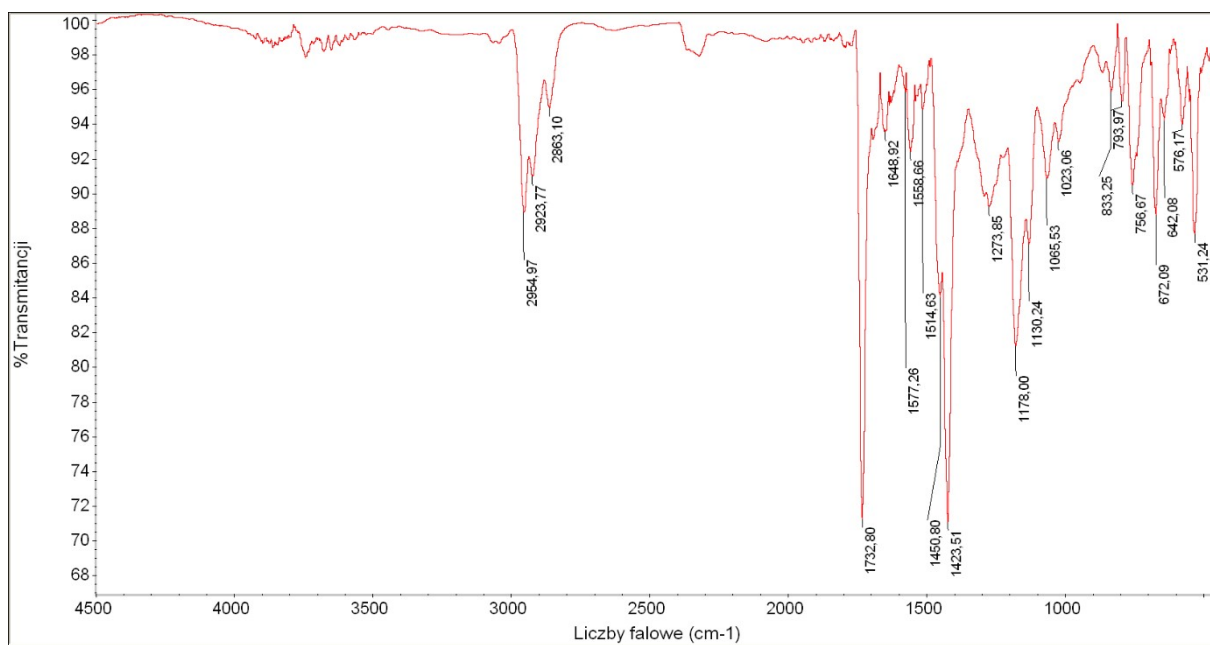

Figure S47. FT-IR spectrum of 70IPD fullerene derivative.

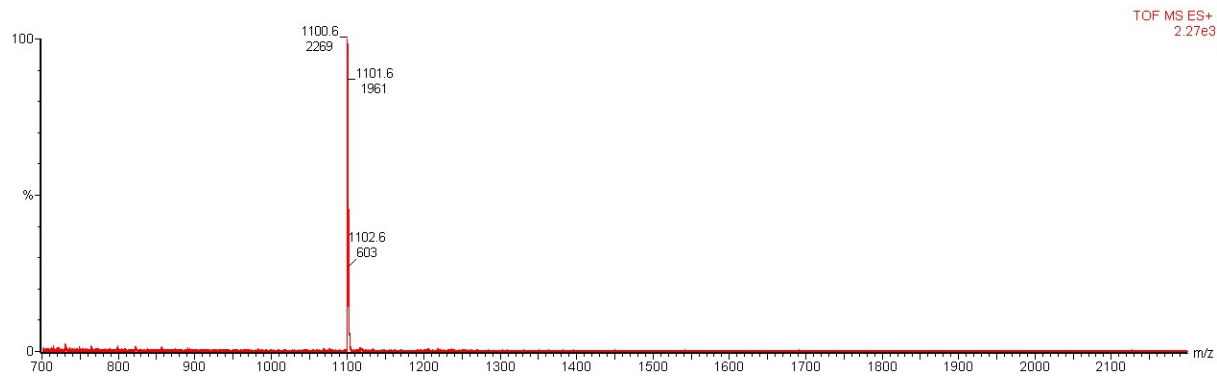

Figure S48. ESI-MS spectrum of **60IPL** fullerene derivative.

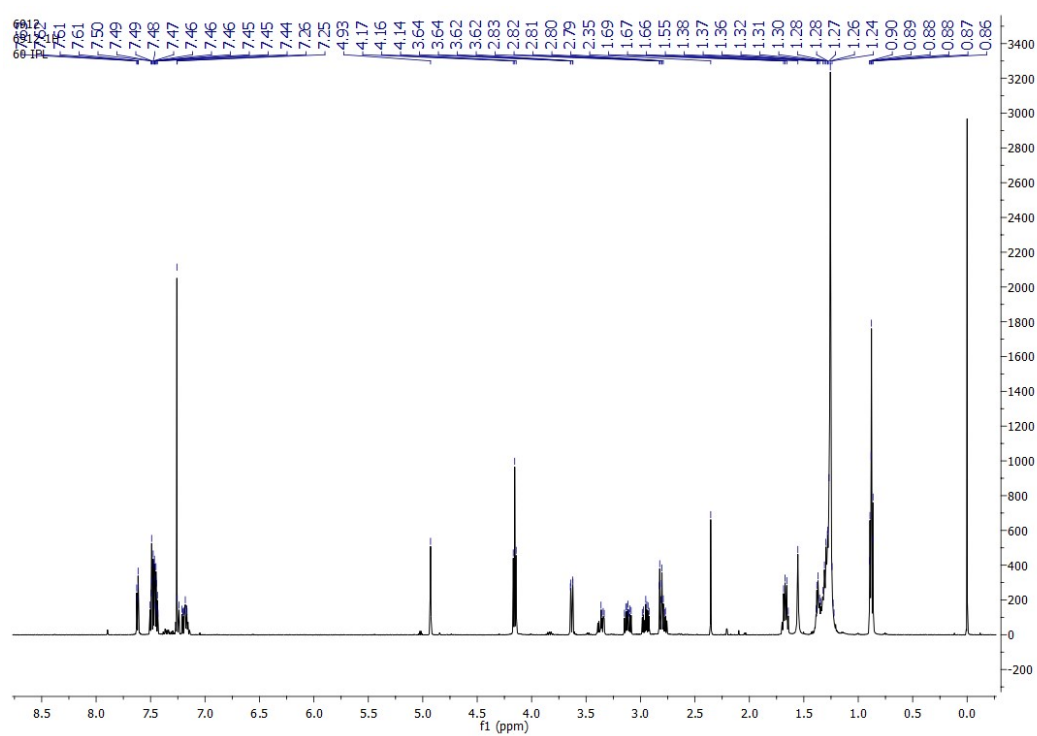

Figure S49.  $^1\text{H}$  NMR spectrum of **60IPL** fullerene derivative.

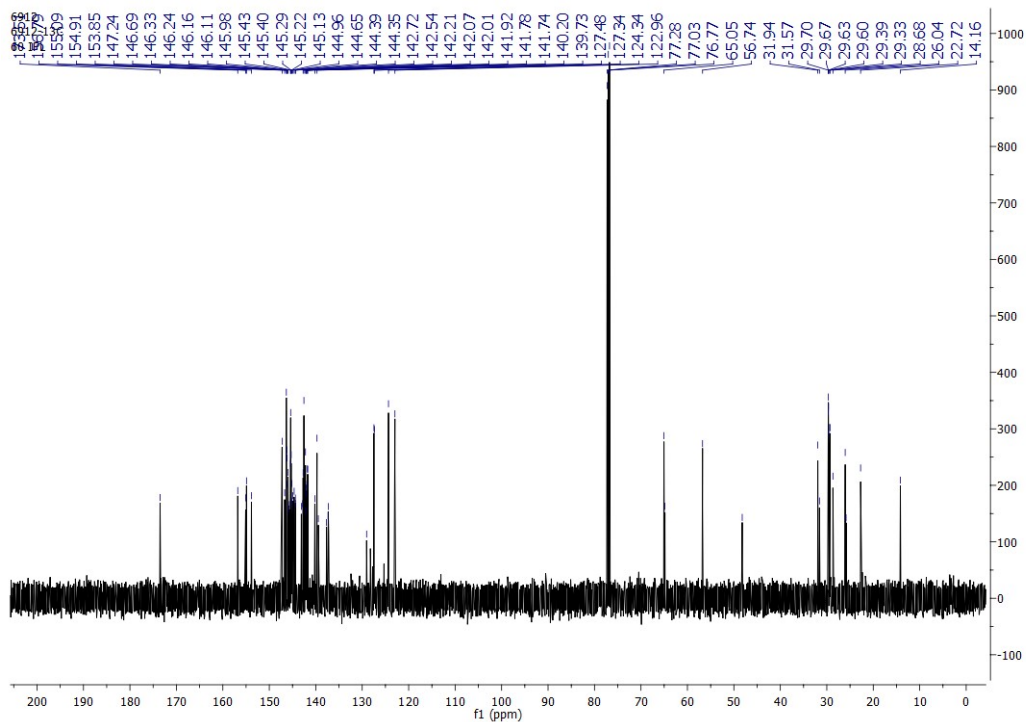

Figure S50.  $^{13}\text{C}$  NMR spectrum of 60IPL fullerene derivative.

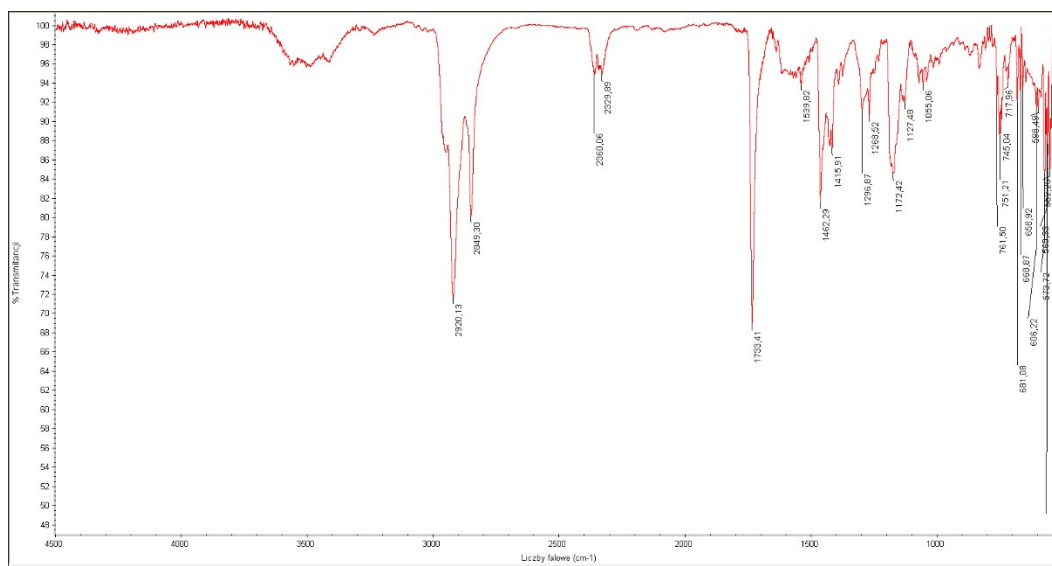

Figure S51. FT-IR spectrum of 60IPL fullerene derivative.

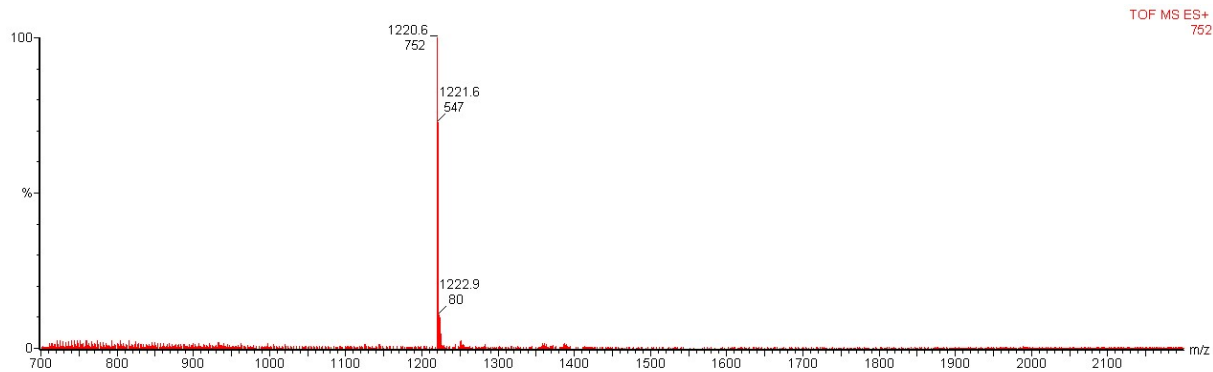

Figure S52. ESI-MS spectrum of 70IPL fullerene derivative.

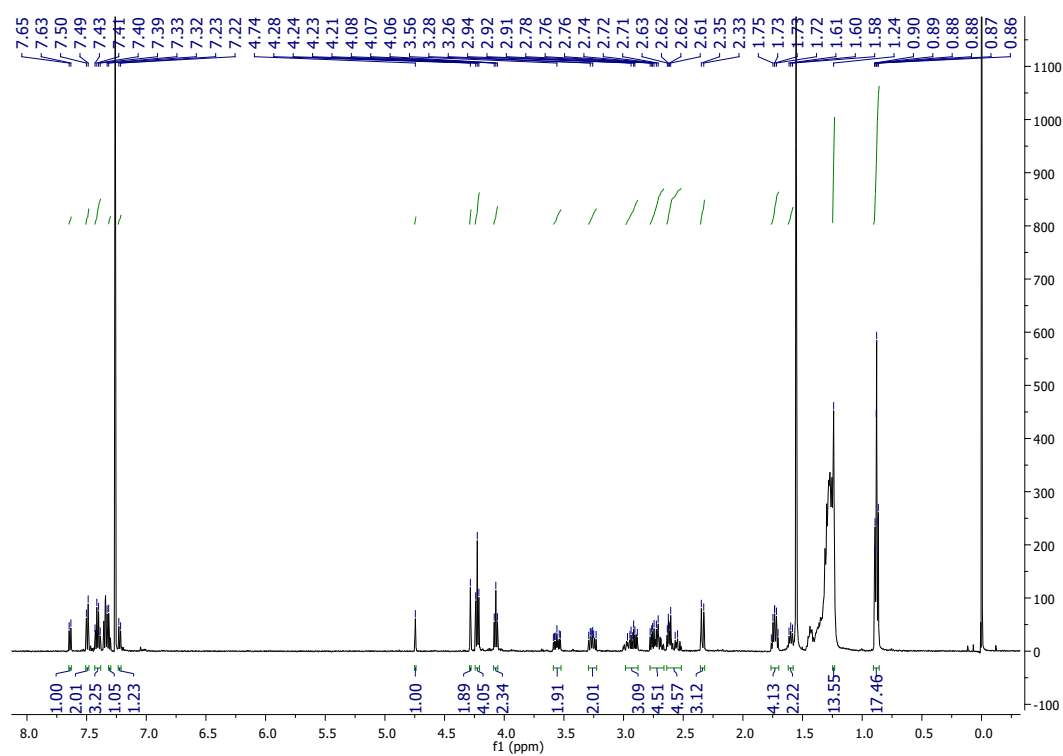

Figure S53. <sup>1</sup>H NMR spectrum of 70IPL fullerene derivative.

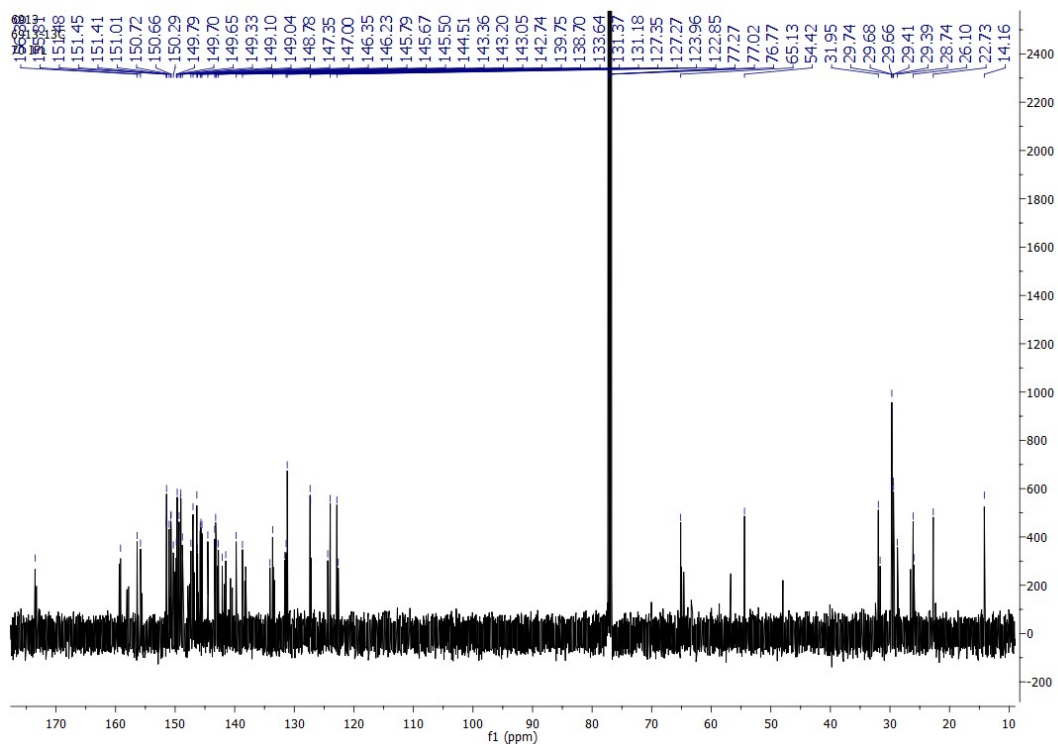

**Figure S54.**  $^{13}\text{C}$  NMR spectrum of 70IPL fullerene derivative.

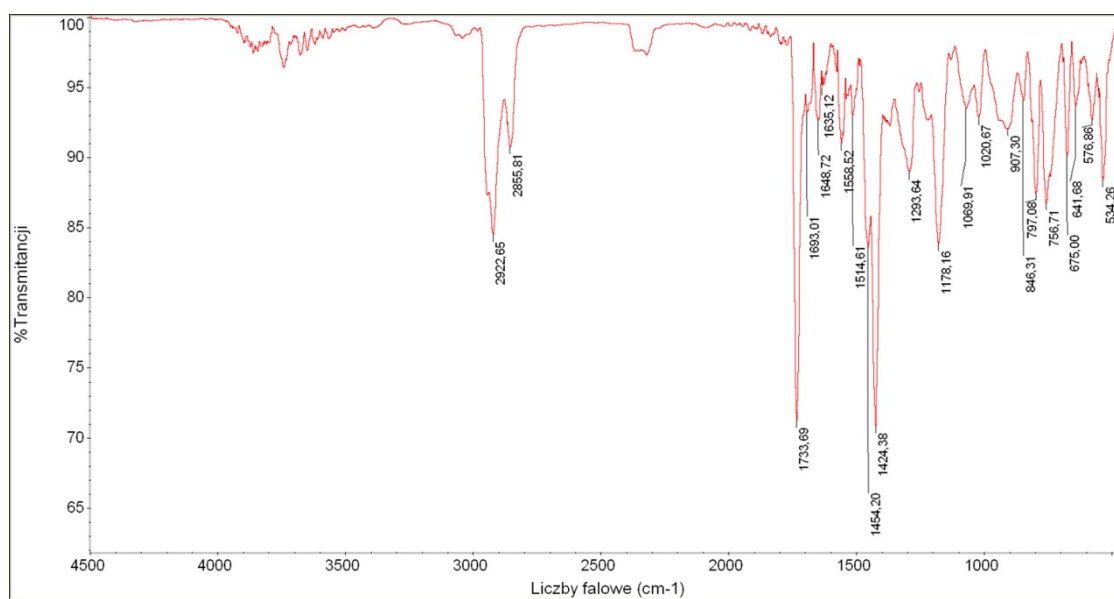

**Figure S55.** FT-IR spectrum of 70IPL fullerene derivative.



PTB7-Th:PC<sub>60</sub>BM

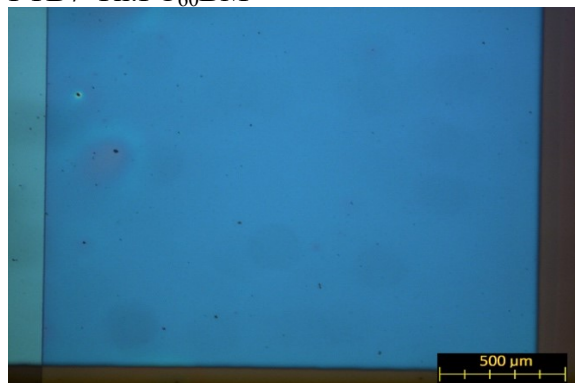

PTB7-Th:60IPB

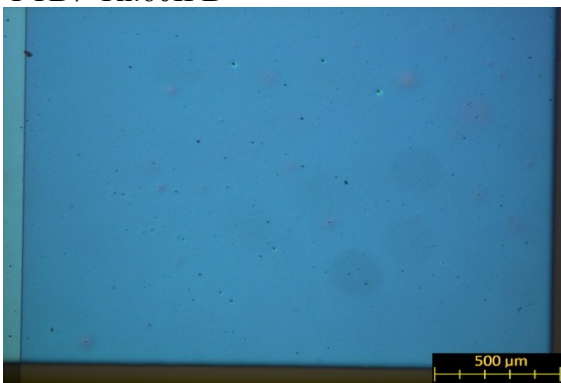

PTB7-Th:60IPH

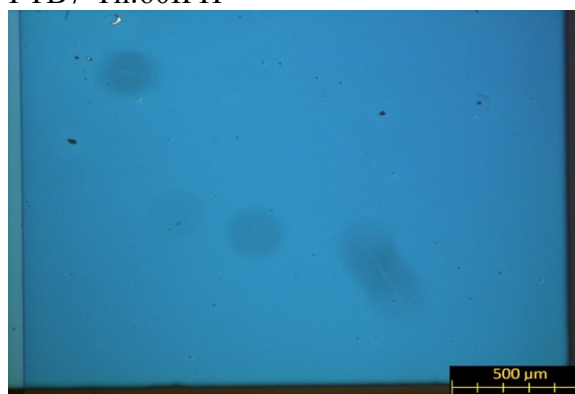

PTB7-Th:60IPO

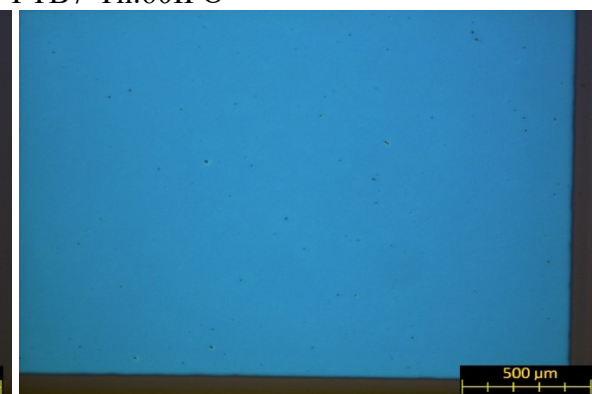

PTB7-Th:60IPD

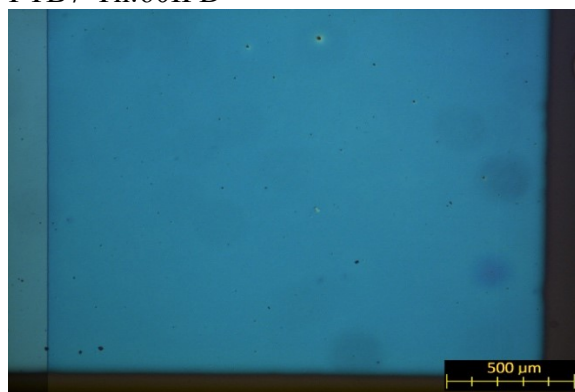

PTB7-Th:60IPL

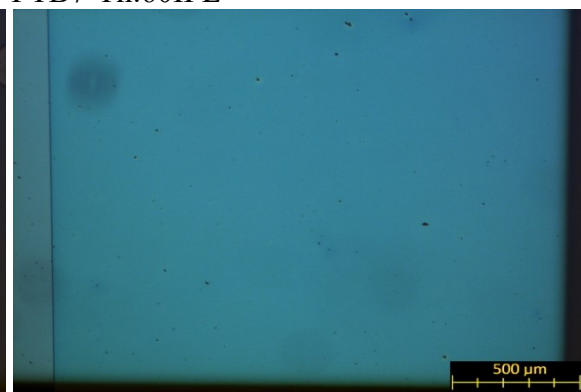

**Figure S56.** Morphology of PTB7-Th\_C<sub>60</sub> solar cells active layers as observed by microscope with differential interference contrast (5X magnification).

PTB7-Th:PC<sub>70</sub>BM

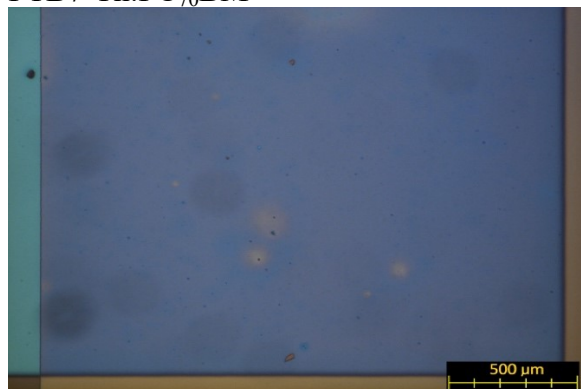

PTB7-Th:70IPB

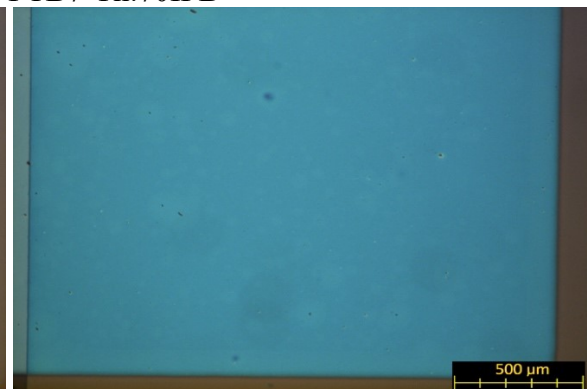

PTB7-Th:70IPH

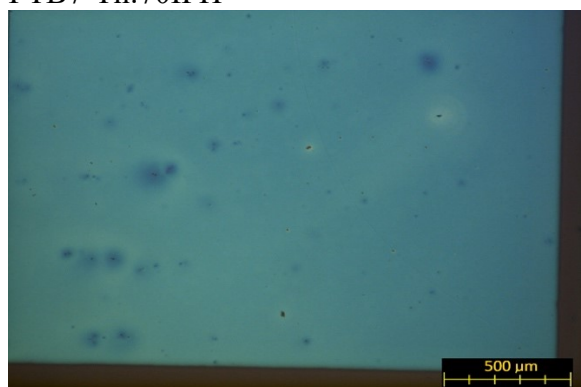

PTB7-Th:70IPO

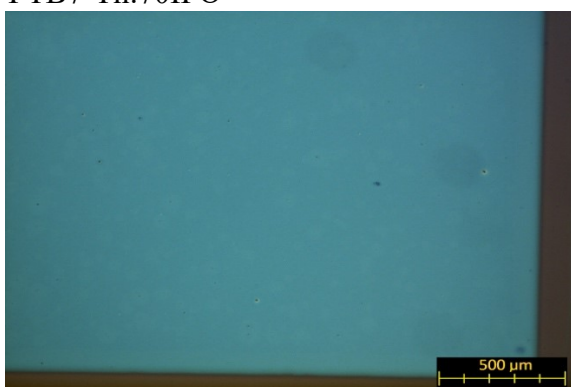

PTB7-Th:70IPD

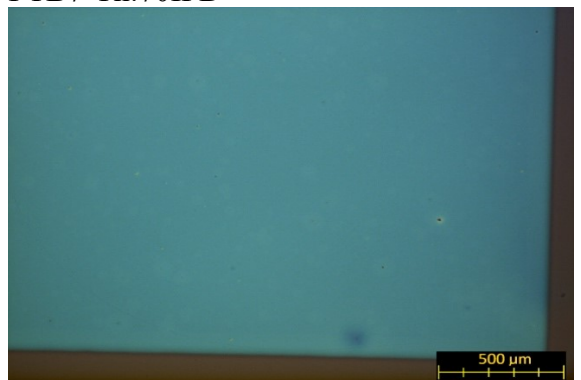

PTB7-Th:70IPL

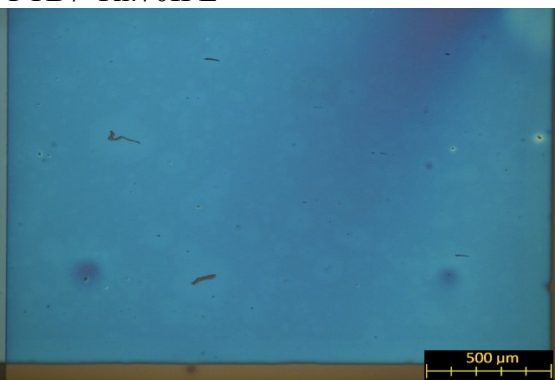

**Figure S57.** Morphology of PTB7-Th<sub>C70</sub> solar cells active layers as observed by microscope with differential interference contrast (5X magnification).

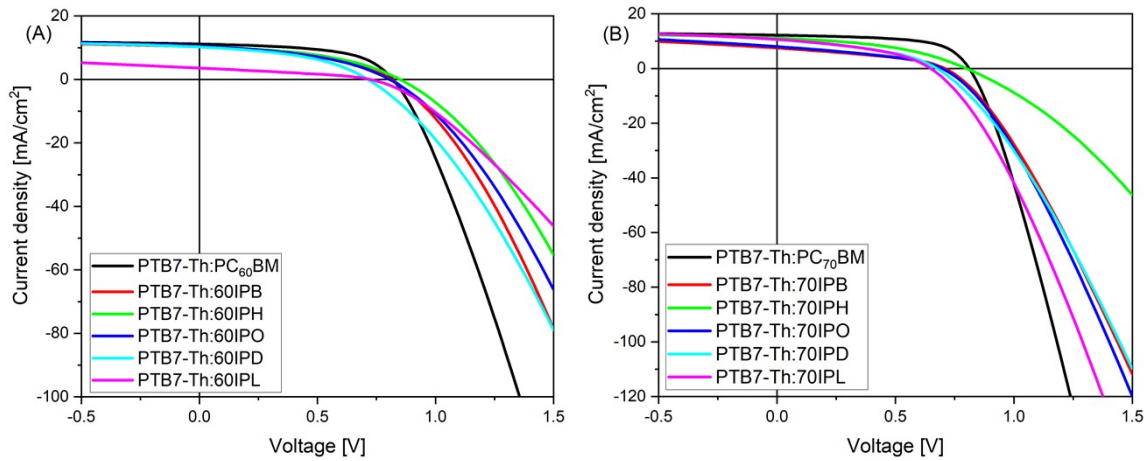

**Figure S58.** J-V characteristics of solar cells with A) PTB7-Th:C<sub>60</sub> and b) PTB7-Th:C<sub>70</sub> active layers.

**Table S1.** Electrical parameters of solar cells with PTB7-Th:C<sub>60</sub> active layers.

| Sample                      | Voc [V] | J <sub>sc</sub> [mA/cm <sup>2</sup> ] | FF [%] | R <sub>s</sub> [Ω*cm <sup>2</sup> ] | R <sub>sh</sub> [Ω*cm <sup>2</sup> ] | PCE [%] | 3 cells Av. PCE [%] | 8 cells Av. PCE [%] |
|-----------------------------|---------|---------------------------------------|--------|-------------------------------------|--------------------------------------|---------|---------------------|---------------------|
| PTB7-Th:PC <sub>60</sub> BM | 0.820   | 11.2                                  | 55.5   | 4.18                                | 620                                  | 5.078   | 5.043 ±0.041        | 4.957 ±0.078        |
| PTB7-Th:60IPB               | 0.814   | 10.3                                  | 46.4   | 6.52                                | 396                                  | 3.885   | 3.801 ±0.066        | 3.556 ±0.237        |
| PTB7-Th:60IPH               | 0.850   | 10.4                                  | 43.9   | 8.85                                | 346                                  | 3.876   | 3.870 ±0.005        | 3.679 ±0.173        |
| PTB7-Th:60IPO               | 0.805   | 10.5                                  | 42.3   | 7.82                                | 279                                  | 3.568   | 3.537 ±0.025        | 3.2876 ±0.230       |
| PTB7-Th:60IPD               | 0.714   | 10.2                                  | 43.6   | 7.45                                | 271                                  | 3.179   | 3.080 ±0.070        | 2.919 ±0.193        |
| PTB7-Th:60IPL               | 0.723   | 3.59                                  | 32.5   | 12.9                                | 276                                  | 0.844   | 0.823 ±0.015        | 0.743 ±0.139        |

**Table S2.** Electrical parameters of solar cells with PTB7-Th:C<sub>70</sub> active layers.

| Sample                      | Voc [V] | J <sub>sc</sub> [mA/cm <sup>2</sup> ] | FF [%] | R <sub>s</sub> [Ω*cm <sup>2</sup> ] | R <sub>sh</sub> [Ω*cm <sup>2</sup> ] | PCE [%] | 3 cells Av. PCE [%] | 8 cells Av. PCE [%] |
|-----------------------------|---------|---------------------------------------|--------|-------------------------------------|--------------------------------------|---------|---------------------|---------------------|
| PTB7-Th:PC <sub>70</sub> BM | 0.811   | 12.2                                  | 61.3   | 2.66                                | 663                                  | 6.076   | 6.060 ±0.013        | 5.856 ±0.275        |
| PTB7-Th:70IPB               | 0.708   | 7.51                                  | 37.4   | 5.54                                | 172                                  | 1.988   | 1.960 ±0.021        | 1.897 ±0.055        |
| PTB7-Th:70IPH               | 0.800   | 11.1                                  | 42.4   | 11.7                                | 276                                  | 3.772   | 3.722 ±0.048        | 3.373 ±0.273        |
| PTB7-Th:70IPO               | 0.675   | 10.6                                  | 39.9   | 5.78                                | 156                                  | 2.844   | 2.771 ±0.058        | 2.338 ±0.398        |
| PTB7-Th:70IPD               | 0.696   | 8.03                                  | 37.2   | 5.09                                | 159                                  | 2.078   | 2.068 ±0.008        | 1.815 ±0.223        |
| PTB7-Th:70IPL               | 0.648   | 10.7                                  | 40.5   | 4.27                                | 158                                  | 2.796   | 2.774 ±0.027        | 2.493 ±0.248        |

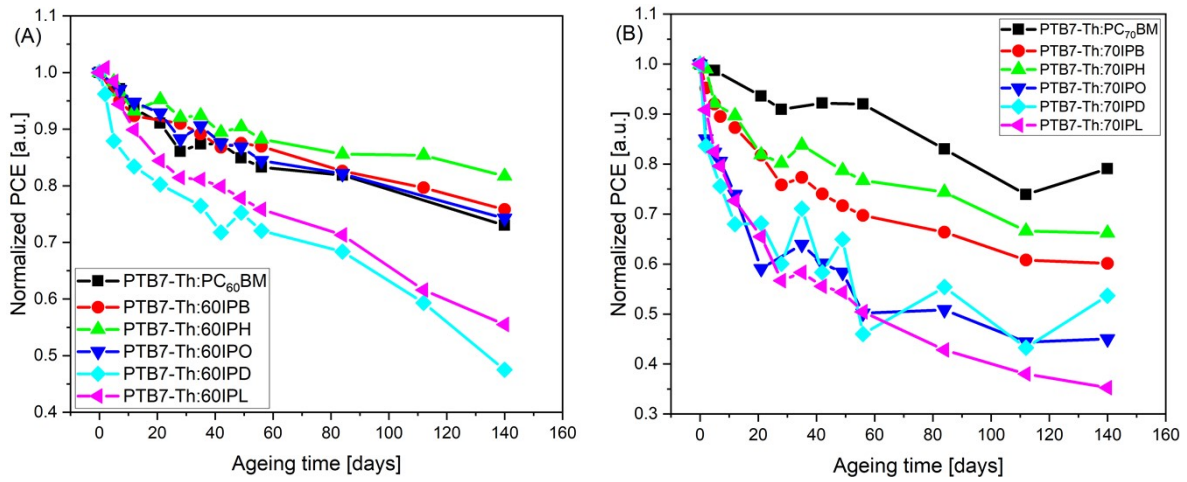

**Figure S59.** Normalized PCE of solar cells with different fullerenes derivatives in function of ageing time: A) C<sub>60</sub>, B) C<sub>70</sub>.

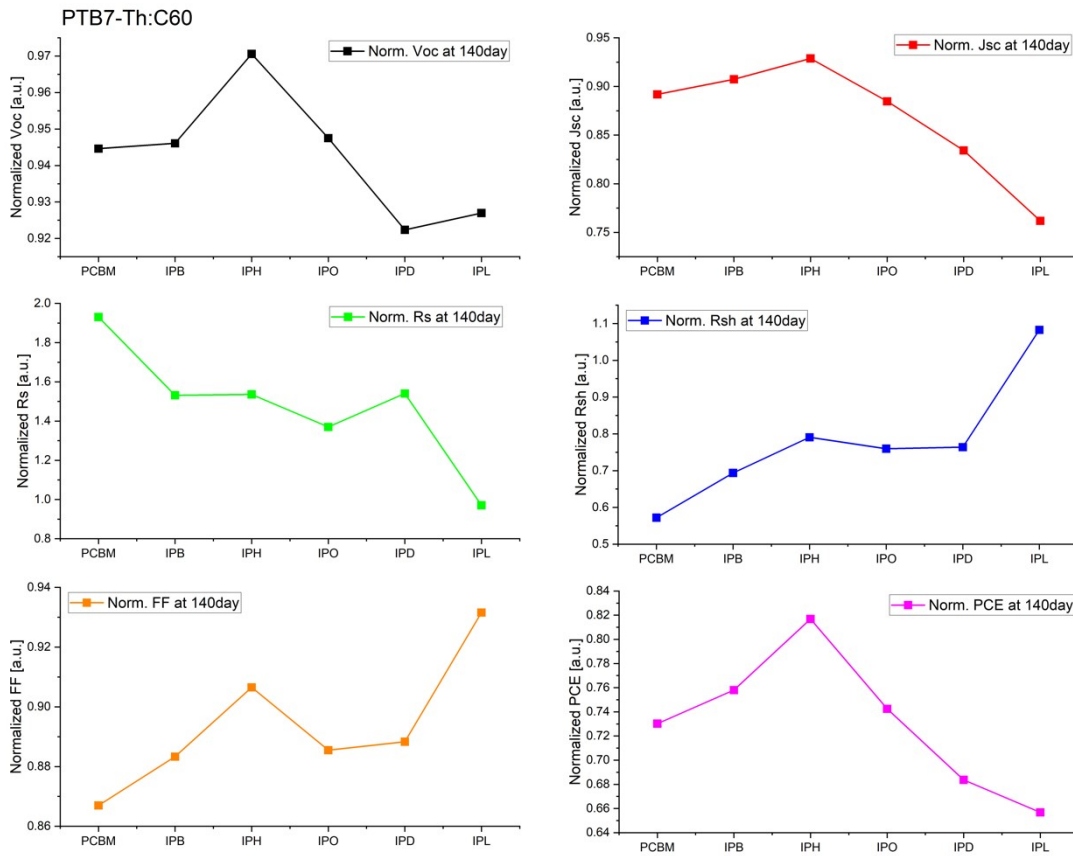

**Figure S60.** Normalized electrical parameters of solar cells with different C<sub>60</sub> fullerene derivatives after 140 days' degradation

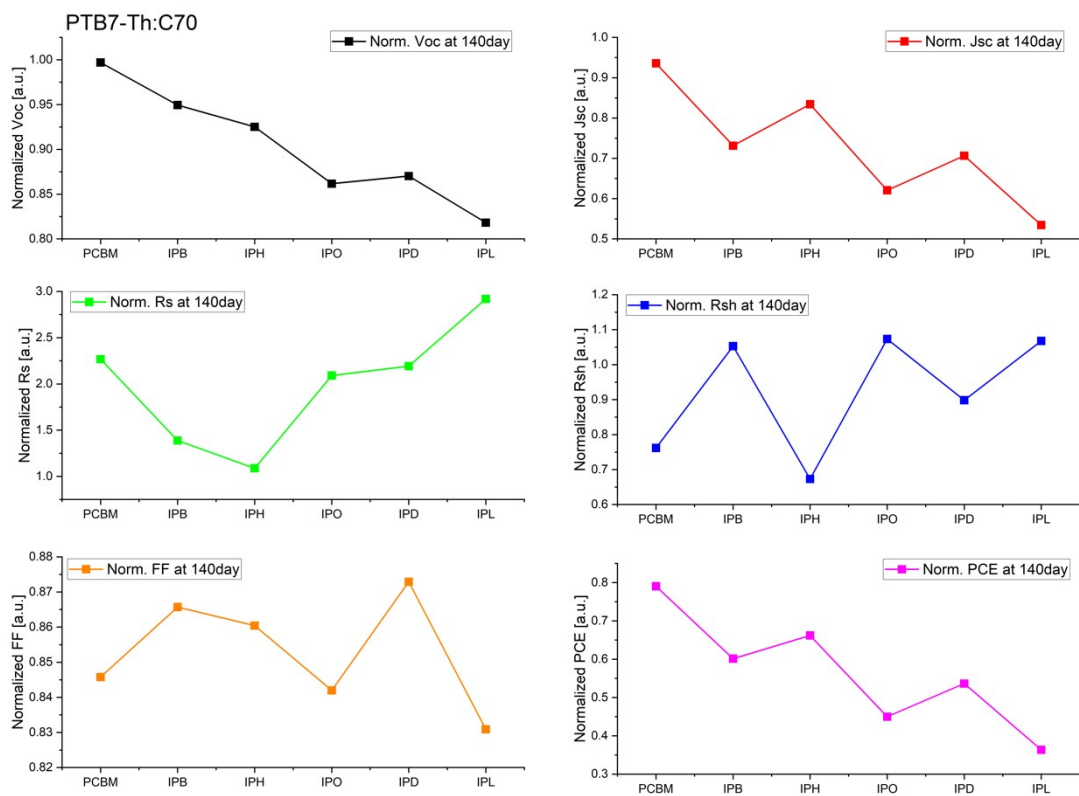

**Figure S61.** Normalized electrical parameters of solar cells with different C70 fullerenes derivatives after 140 days' degradation

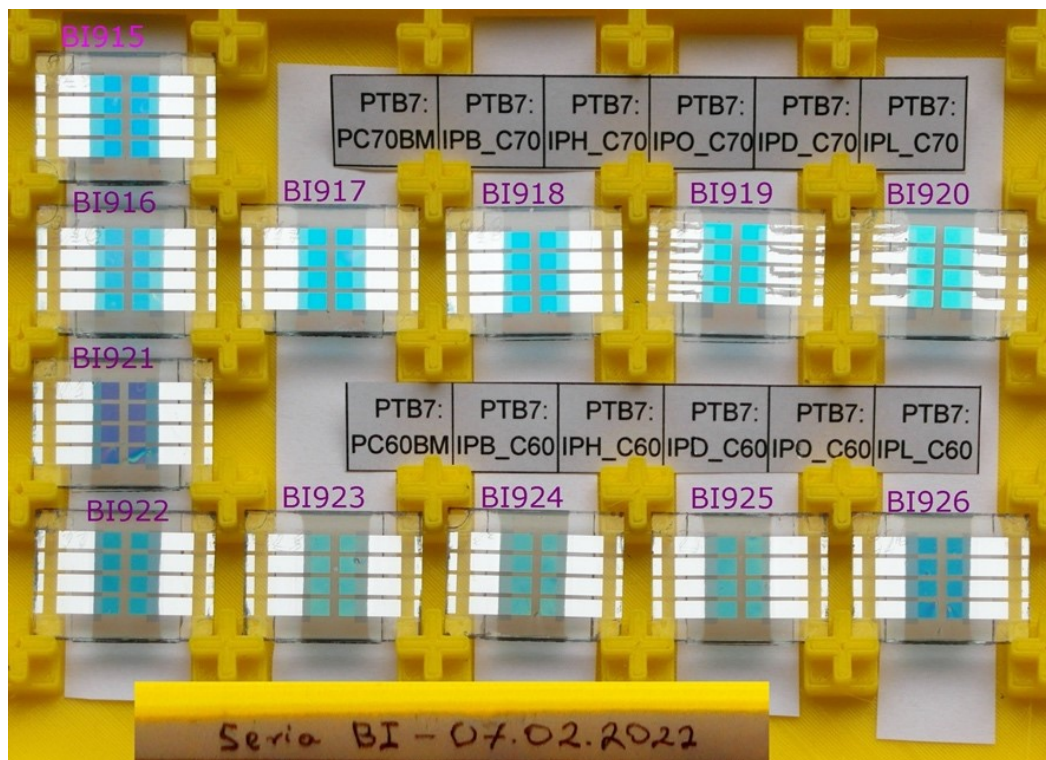

**Figure S62.** Photo of solar cells samples form one production series after encapsulation process
